# Supplementary material for: Optimizing the benefit–risk trade-off in nano-agrochemicals through explainable machine learning: beyond concentration
Source: Royal Society of Chemistry journal article supplement (doi:10.1039/d4en00213j), 2024-01-01
Supplement: d4en00213j1.pdf [file d4en00213j1.pdf]

## Supporting Information for

### **Optimizing benefit-risk trade-off in nano-agrochemicals through explainable machine learning: Beyond concentration**

Hengjie Yu,<sup>a</sup> Shiyu Tang,<sup>b</sup> Eslam M. Hamed,<sup>b,c</sup> Sam F. Y. Li,<sup>b</sup> Yaochu Jin,<sup>d</sup> and Fang Cheng<sup>\*a</sup>

<sup>a</sup>College of Biosystems Engineering and Food Science, Zhejiang University, Hangzhou 310058, China

<sup>b</sup>Department of Chemistry, National University of Singapore, 3 Science Drive 3, Singapore 117543, Singapore

<sup>c</sup>Department of Chemistry, Faculty of Science, Ain Shams University, Abbassia, Cairo 11566, Egypt

<sup>d</sup>Trustworthy and General Artificial Intelligence Laboratory, School of Engineering, Westlake University, Hangzhou 310030, China

\*e-mail: fcheng@zju.edu.cn

This information file includes:

- Figures S1-S12
- Tables S1-S10

## Figures

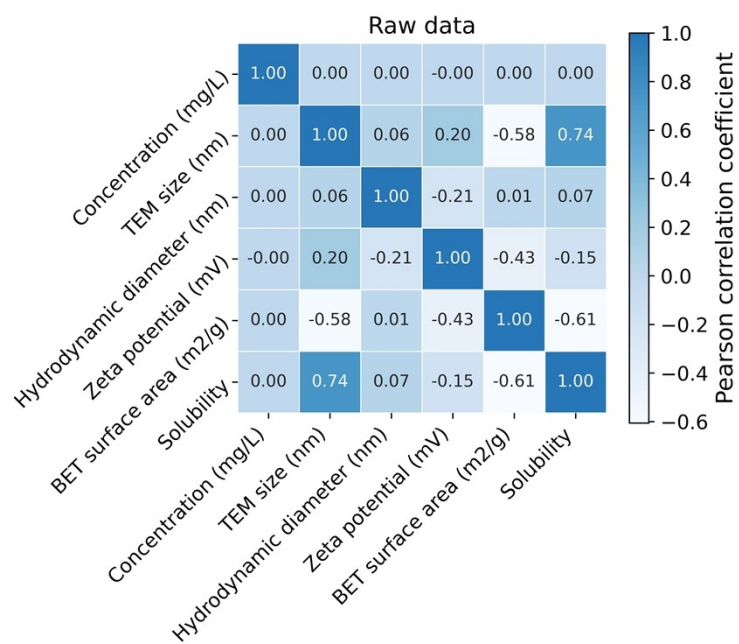

**Figure S1.** Person correlation coefficient of features in the collected datasets with solubility.

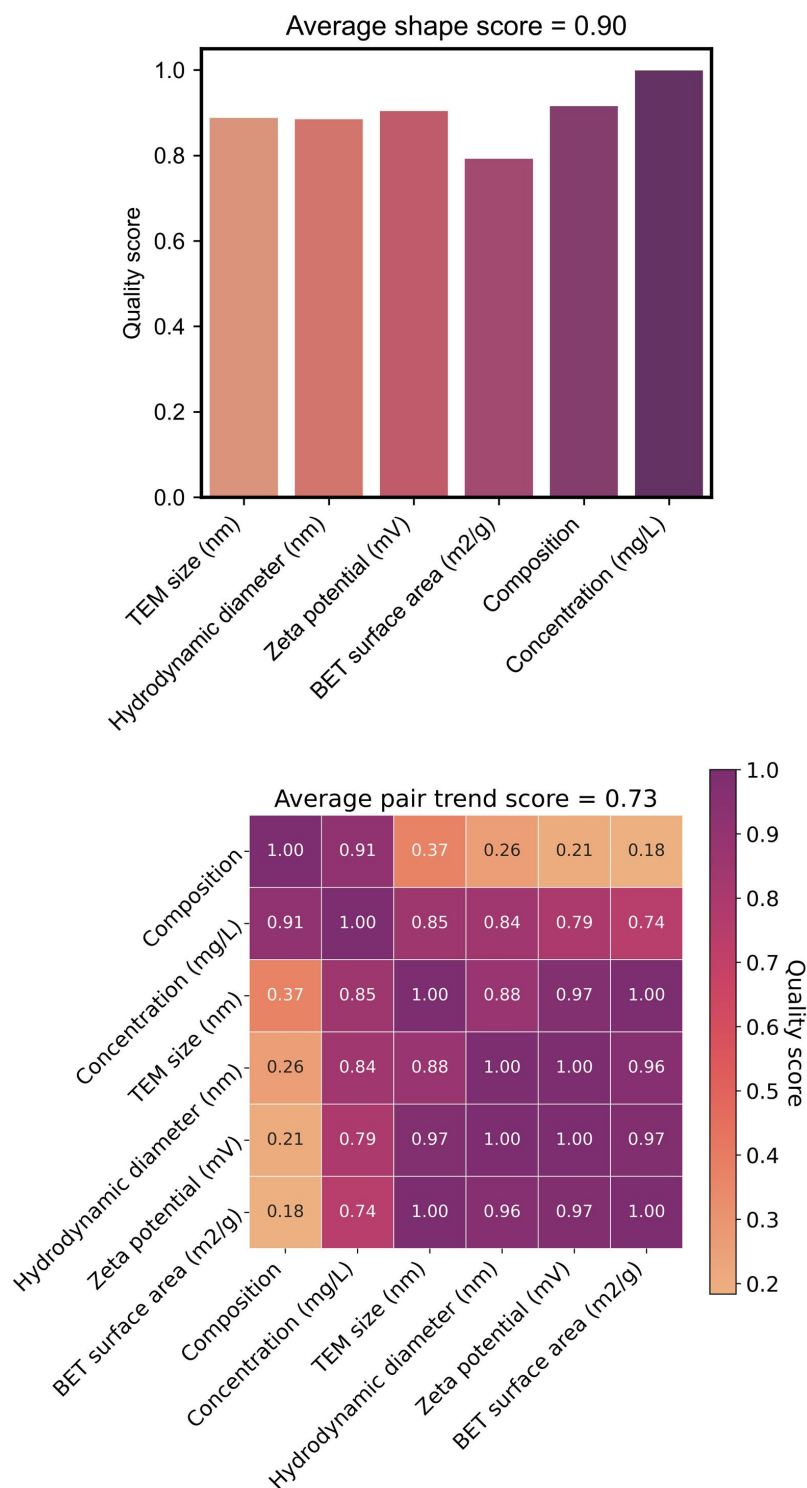

**Figure S2.** Average shape scores and pair trend scores for evaluating the data distribution and feature correlation of the generated data.

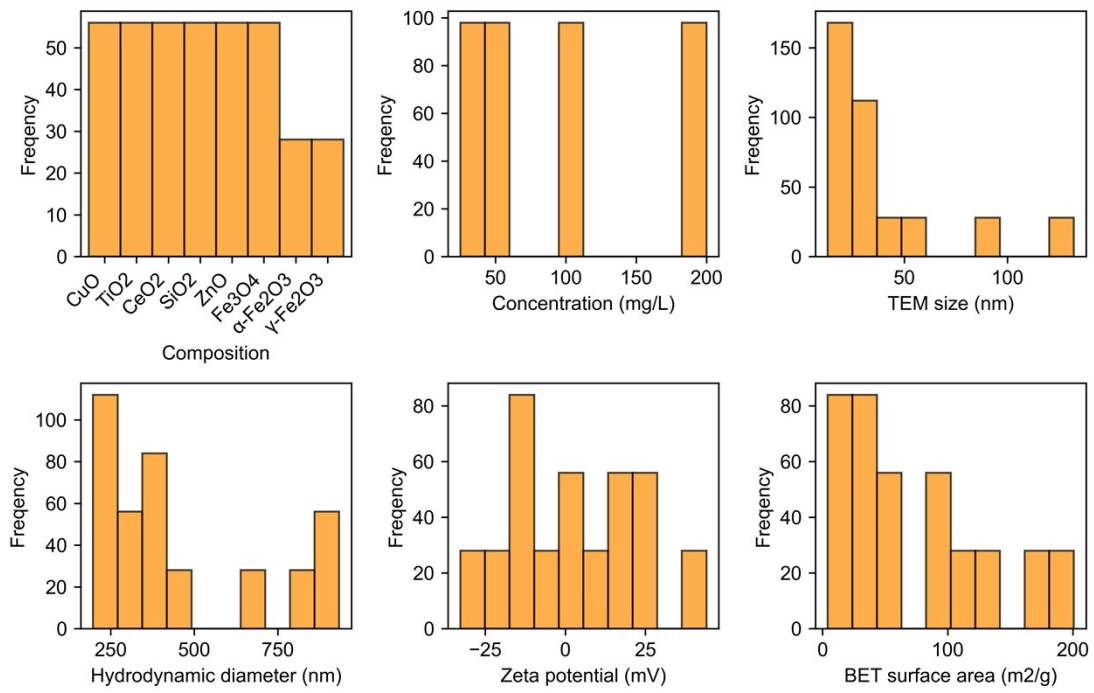

**Figure S3.** Data distribution of raw data used for machine learning.

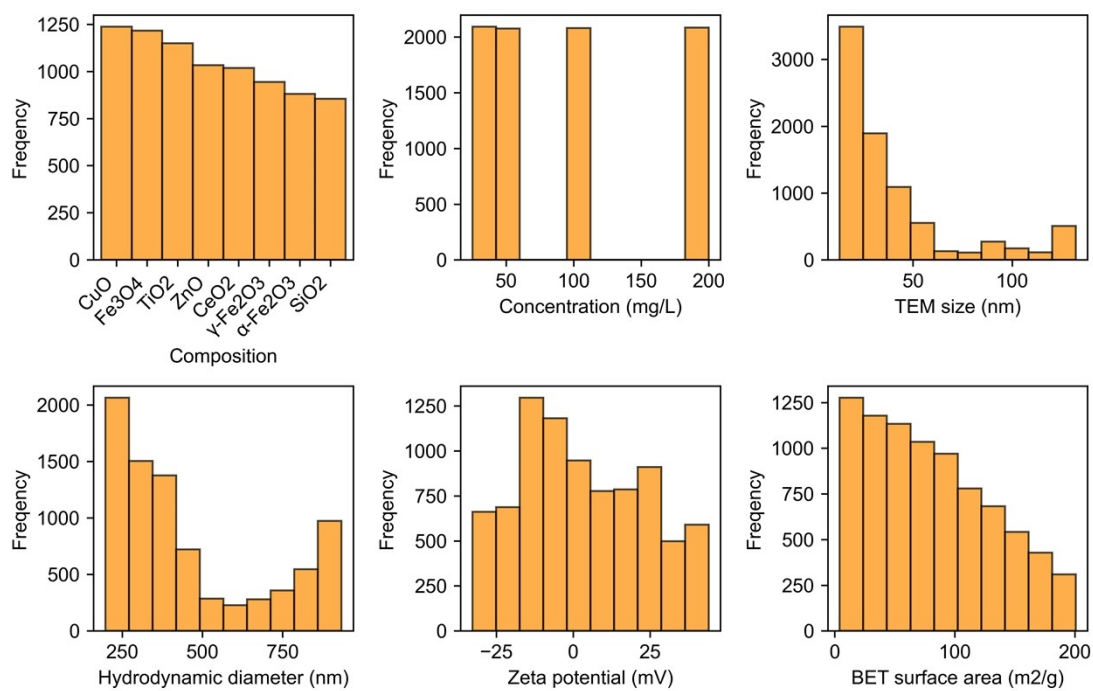

**Figure S4.** Data distribution of generated data used for MOO.

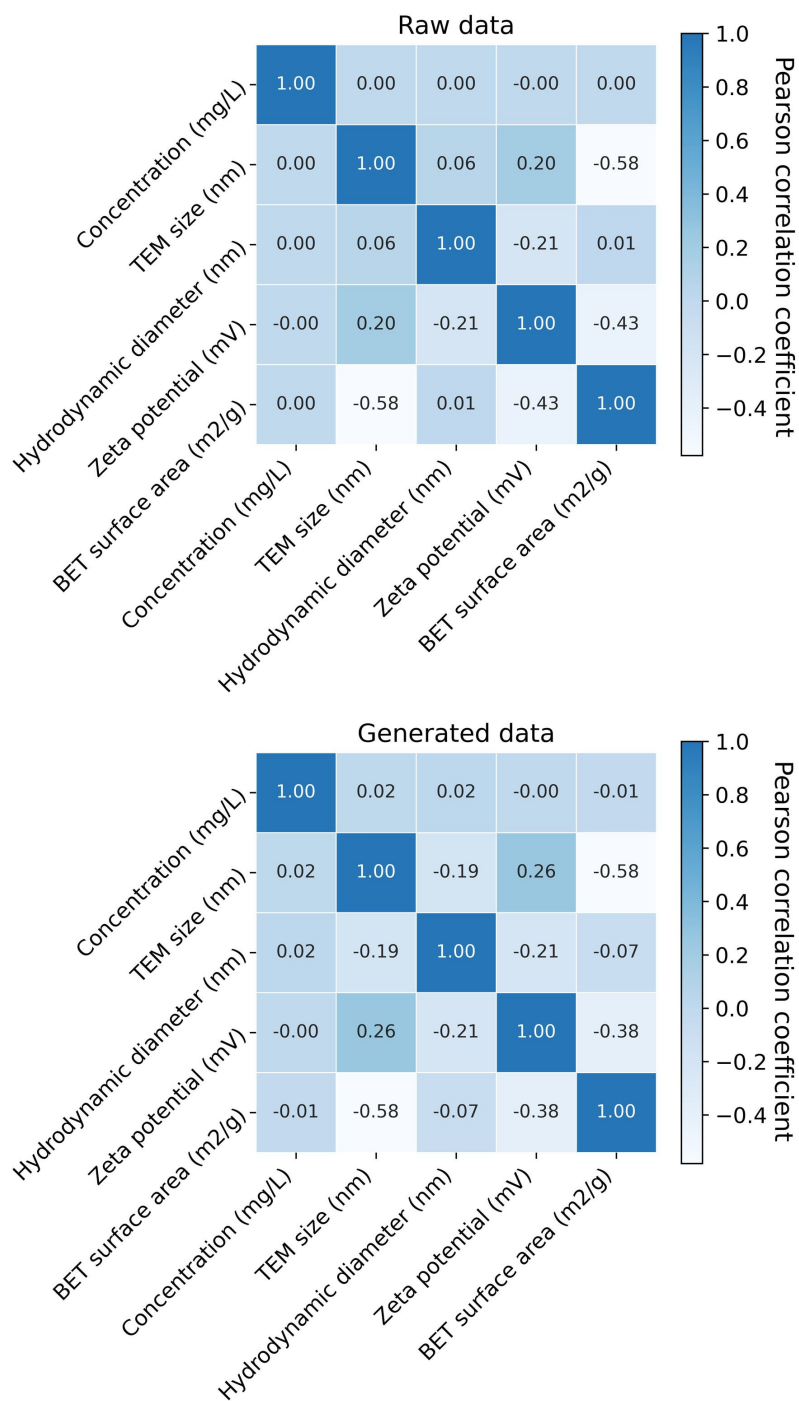

**Figure S5.** Feature correlation of the raw dataset and generated dataset.

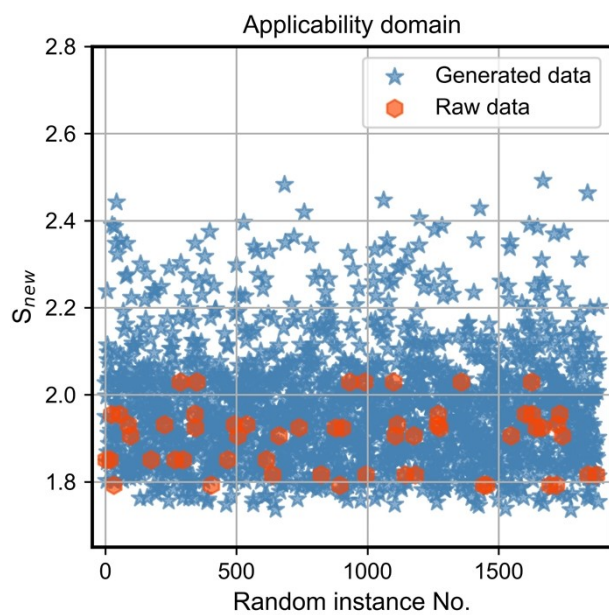

**Figure S6.** Applicability domain of the raw data and generated data (for instances that require the calculation of  $S_{new}$ ).

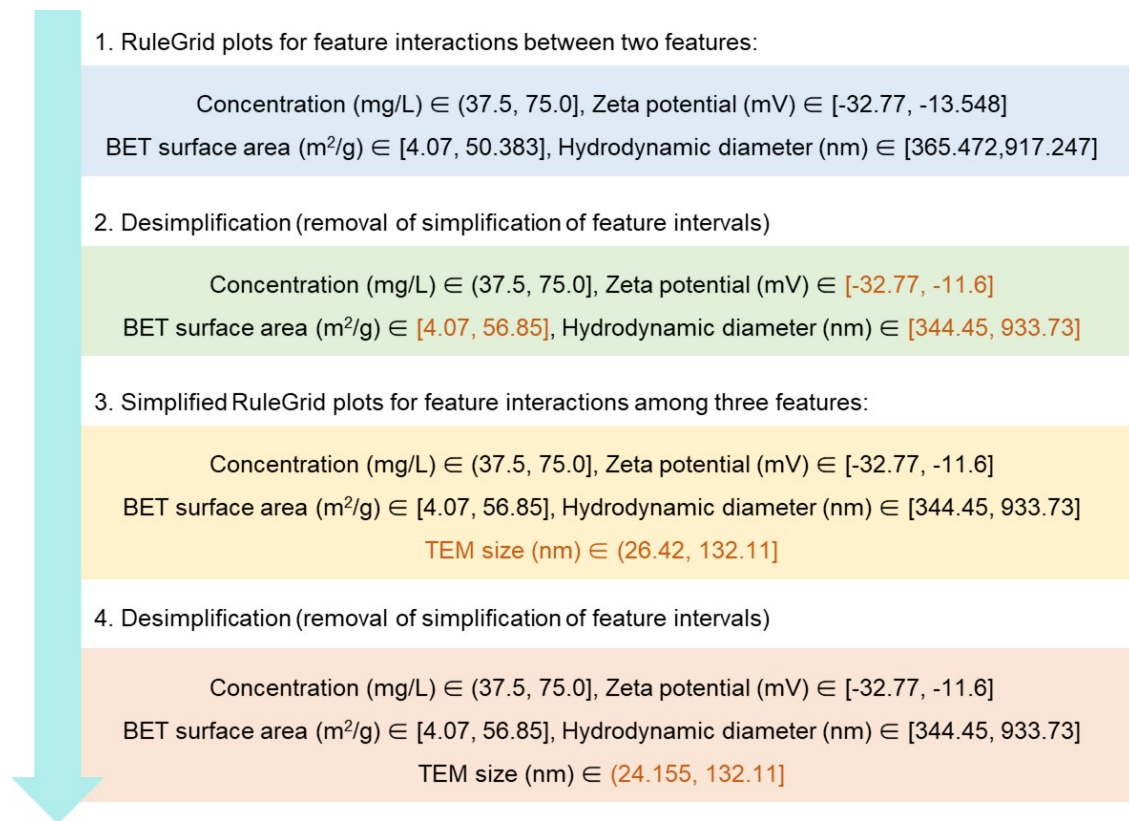

**Figure S7.** Selection workflow of feature intervals for maximum RDW and minimum RMC.



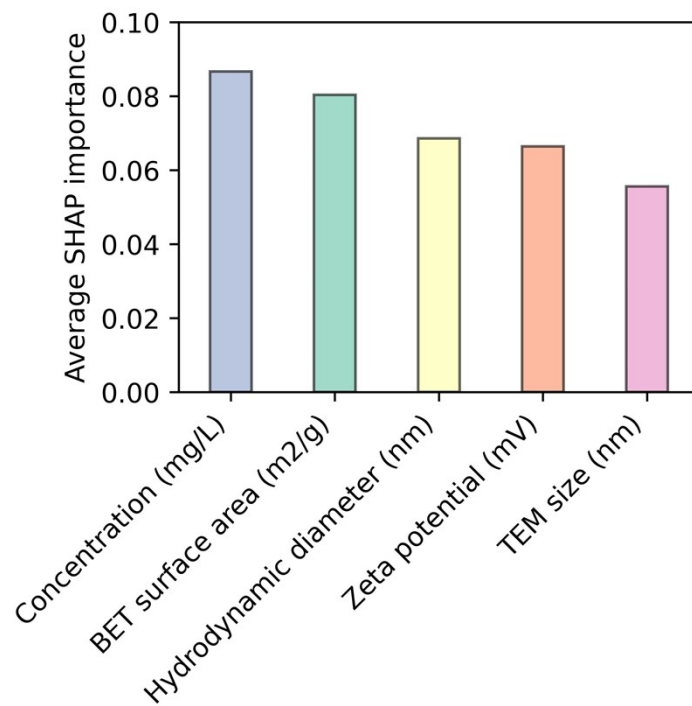

**Figure S8.** Average SHAP values for five features in the NPI prediction model.

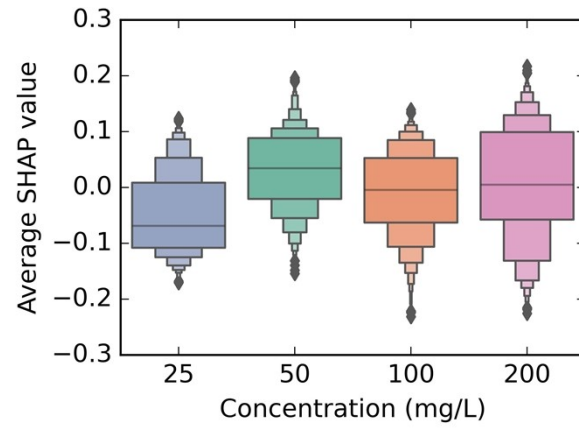

**Figure S9.** Letter-value plot for SHAP effects of concentration in the NPI prediction model.

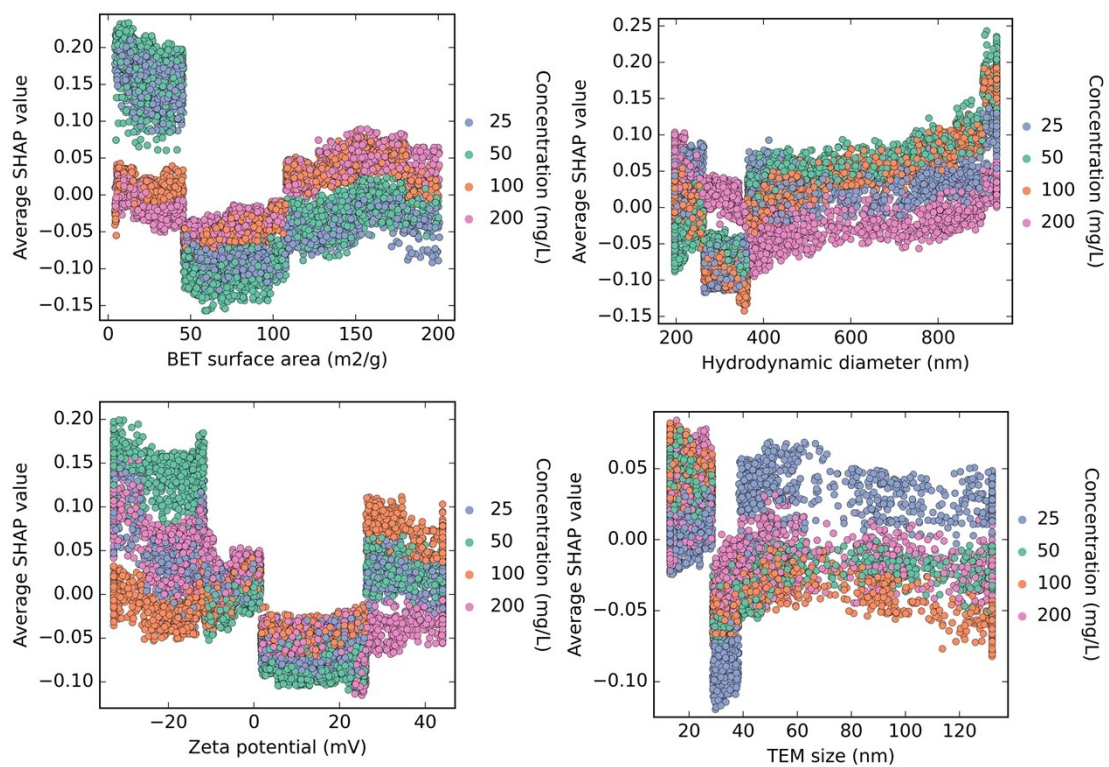

**Figure S10.** SHAP plots for other four features in the NPI prediction model.

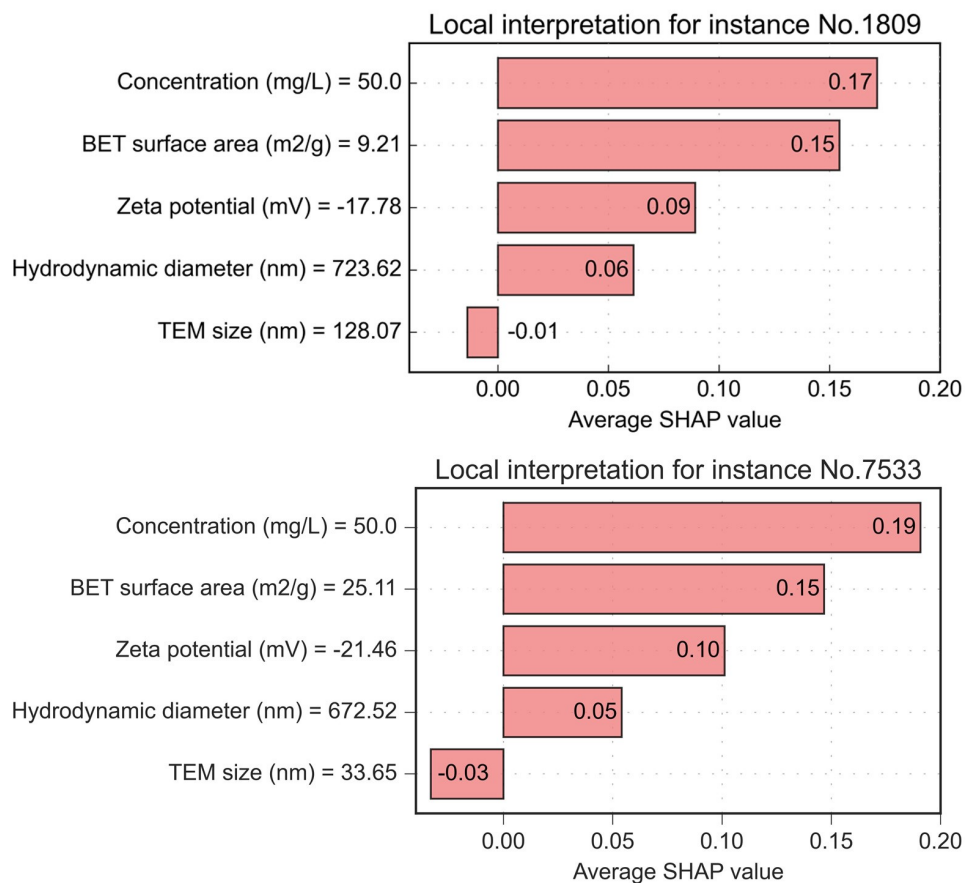

**Figure S11.** SHAP local interpretation for No. 1809 and No. 7533.

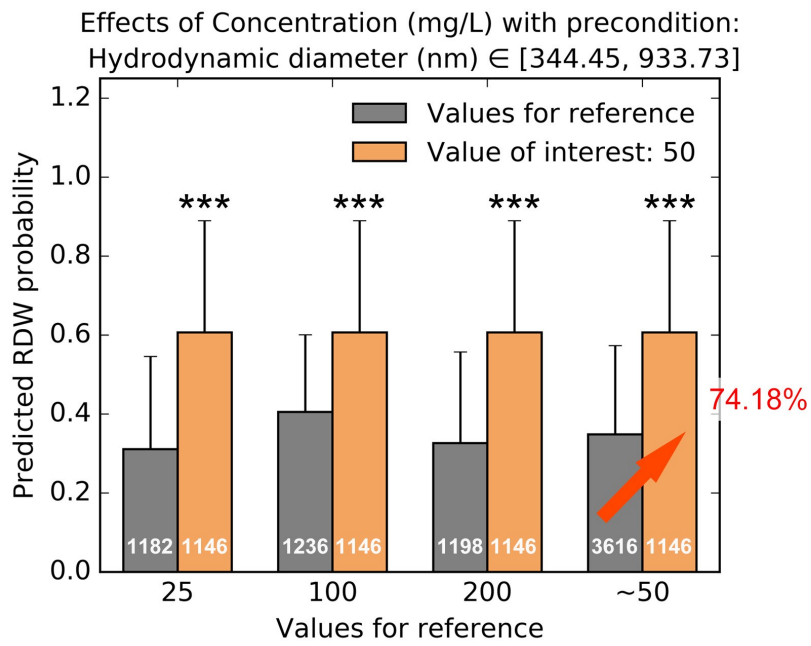

**Figure S12.** Independent effects of concentration and its combined effects with hydrodynamic diameter of [344.45, 933.73] nm.

## Tables

**Table S1.** The versions of the main software and packages used in this study.

| <b>Software/packages</b> | <b>Version</b> |
|--------------------------|----------------|
| python                   | 3.10.8         |
| scikit-learn             | 1.2.0          |
| shap                     | 0.41.0         |
| imodels                  | 1.2.5          |
| sdv                      | 1.2.0          |

**Table S2.** The hyperparameters of the RuleFit models for RDW.

| random state | max_rules | n_estimators | tree_generator               | tree_size |
|--------------|-----------|--------------|------------------------------|-----------|
| 1            | 30        | 300          | RandomForestRegressor()      | 3         |
| 2            | 48        | 200          | RandomForestRegressor()      | 3         |
| 3            | 38        | 300          | GradientBoostingRegressor()  | 3         |
| 4            | 46        | 200          | GradientBoostingRegressor()  | 4         |
| 5            | 42        | 200          | GradientBoostingClassifier() | 5         |
| 6            | 38        | 300          | GradientBoostingClassifier() | 3         |
| 7            | 42        | 200          | GradientBoostingRegressor()  | 3         |
| 8            | 40        | 200          | GradientBoostingClassifier() | 3         |
| 9            | 52        | 700          | RandomForestRegressor()      | 5         |
| 10           | 42        | 200          | None                         | 5         |

**Table S3.** The hyperparameters of the RuleFit models for RMC.

| <b>random state</b> | <b>max_rules</b> | <b>n_estimators</b> | <b>tree_generator</b>       | <b>tree_size</b> |
|---------------------|------------------|---------------------|-----------------------------|------------------|
| 1                   | 26               | 100                 | None                        | 3                |
| 2                   | 30               | 100                 | RandomForestRegressor()     | 6                |
| 3                   | 38               | 400                 | GradientBoostingRegressor() | 5                |
| 4                   | 32               | 500                 | RandomForestRegressor()     | 4                |
| 5                   | 52               | 200                 | RandomForestRegressor()     | 3                |
| 6                   | 34               | 300                 | GradientBoostingRegressor() | 3                |
| 7                   | 26               | 100                 | RandomForestRegressor()     | 4                |
| 8                   | 38               | 100                 | None                        | 3                |
| 9                   | 30               | 100                 | GradientBoostingRegressor() | 3                |
| 10                  | 26               | 100                 | GradientBoostingRegressor() | 5                |



**Table S4.** The rules generated by ten RuleFit models for RDW predictions (importance >0.1).

| Rule                                                                                                                         | Coefficient | Support | Importance | Model |
|------------------------------------------------------------------------------------------------------------------------------|-------------|---------|------------|-------|
| Concentration (mg/L) <= 37.5 and TEM size (nm) <= 38.345 and TEM size (nm) > 13.07                                           | -4.5496     | 0.1488  | 1.6192     | 7     |
| Concentration (mg/L) <= 150.0 and Concentration (mg/L) > 75.0 and TEM size (nm) <= 24.155 and Zeta potential (mV) <= -14.585 | -7.2962     | 0.0417  | 1.4580     | 2     |
| Concentration (mg/L) > 150.0 and Hydrodynamic diameter (nm) <= 363.47 and Zeta potential (mV) <= 23.55                       | 4.8211      | 0.1012  | 1.4540     | 2     |
| Concentration (mg/L) <= 37.5 and Zeta potential (mV) <= 26.17 and Zeta potential (mV) > -13.03                               | 3.8589      | 0.1667  | 1.4381     | 2     |
| Concentration (mg/L) > 150.0 and TEM size (nm) <= 32.04 and Zeta potential (mV) > -9.325                                     | -4.1698     | 0.0952  | 1.2240     | 5     |
| Concentration (mg/L) <= 150.0 and Hydrodynamic diameter (nm) <= 363.47                                                       | -2.5109     | 0.3571  | 1.2031     | 7     |
| Concentration (mg/L) > 37.5 and Zeta potential (mV) > -13.03                                                                 | -2.3405     | 0.5774  | 1.1562     | 8     |
| Concentration (mg/L) <= 150.0 and Zeta potential (mV) > 26.17                                                                | 3.6256      | 0.1131  | 1.1483     | 7     |
| Concentration (mg/L) <= 150.0 and Hydrodynamic diameter (nm) > 363.47                                                        | 2.3560      | 0.3750  | 1.1406     | 8     |
| Concentration (mg/L) <= 37.5 and Hydrodynamic diameter (nm) > 263.34999                                                      | -2.8611     | 0.1786  | 1.0958     | 2     |
| Concentration (mg/L) <= 75.0 and Zeta potential (mV) <= -11.6                                                                | 3.0043      | 0.1548  | 1.0866     | 7     |
| Concentration (mg/L) > 150.0 and TEM size (nm) > 19.155 and Hydrodynamic diameter (nm) <= 263.34999                          | -5.3958     | 0.0417  | 1.0782     | 2     |
| Concentration (mg/L) <= 75.0 and Concentration (mg/L) > 37.5 and Zeta potential (mV) <= -11.6                                | 3.9339      | 0.0714  | 1.0131     | 5     |
| Concentration (mg/L) > 150.0 and TEM size (nm) > 14.68 and Zeta potential (mV) <= 23.25                                      | 2.6522      | 0.1607  | 0.9741     | 5     |
| Concentration (mg/L) > 150.0 and TEM size (nm) > 14.68 and Zeta potential (mV) <= 26.17                                      | 2.5088      | 0.1667  | 0.9350     | 2     |
| Concentration (mg/L) > 150.0 and Zeta potential (mV) <= -11.6                                                                | -3.7780     | 0.0655  | 0.9345     | 2     |
| Concentration (mg/L) > 37.5 and Zeta potential (mV) <= 26.17 and Zeta potential (mV) > -13.03                                | -1.8709     | 0.4583  | 0.9322     | 2     |
| Concentration (mg/L) > 150.0 and Hydrodynamic diameter (nm) <= 900.76498 and Zeta potential (mV) <= 23.25                    | 2.4483      | 0.1667  | 0.9124     | 8     |
| Concentration (mg/L) > 37.5 and Hydrodynamic                                                                                 | 2.7632      | 0.1190  | 0.8948     | 2     |

|                                                                                                                             |         |        |        |    |
|-----------------------------------------------------------------------------------------------------------------------------|---------|--------|--------|----|
| diameter (nm) > 276.06999 and BET surface area (m <sup>2</sup> /g) > 107.75                                                 |         |        |        |    |
| Concentration (mg/L) > 37.5 and Zeta potential (mV) <= -13.03                                                               | 2.2546  | 0.1845 | 0.8746 | 2  |
| Concentration (mg/L) <= 150.0 and Hydrodynamic diameter (nm) > 363.47                                                       | 1.7991  | 0.3750 | 0.8710 | 7  |
| Concentration (mg/L) <= 37.5 and Hydrodynamic diameter (nm) <= 263.34999                                                    | 3.6635  | 0.0595 | 0.8668 | 2  |
| Concentration (mg/L) > 150.0 and TEM size (nm) <= 43.445 and Zeta potential (mV) <= -9.325                                  | 2.8875  | 0.0952 | 0.8476 | 6  |
| Hydrodynamic diameter (nm) > 263.34999 and Zeta potential (mV) > -11.6                                                      | -1.6831 | 0.5714 | 0.8329 | 8  |
| Concentration (mg/L) > 150.0 and Hydrodynamic diameter (nm) <= 363.47 and Hydrodynamic diameter (nm) > 263.34999            | 3.2663  | 0.0655 | 0.8080 | 7  |
| Concentration (mg/L) > 37.5 and TEM size (nm) > 13.07                                                                       | 1.7115  | 0.6845 | 0.7954 | 8  |
| Concentration (mg/L) > 37.5 and Hydrodynamic diameter (nm) <= 312.84999                                                     | 1.6574  | 0.3036 | 0.7621 | 2  |
| Concentration (mg/L) > 150.0 and TEM size (nm) <= 29.155                                                                    | -2.1179 | 0.1488 | 0.7538 | 2  |
| Concentration (mg/L) > 150.0 and TEM size (nm) > 29.155 and Hydrodynamic diameter (nm) <= 363.47                            | 3.3315  | 0.0536 | 0.7501 | 3  |
| Concentration (mg/L) > 150.0 and Hydrodynamic diameter (nm) <= 736.38501                                                    | 1.8589  | 0.1964 | 0.7385 | 2  |
| Concentration (mg/L) <= 37.5 and Hydrodynamic diameter (nm) <= 543.41499 and BET surface area (m <sup>2</sup> /g) > 181.475 | -5.4802 | 0.0179 | 0.7258 | 2  |
| Concentration (mg/L) > 75.0 and Zeta potential (mV) > -4.945                                                                | 1.6055  | 0.2857 | 0.7253 | 5  |
| Concentration (mg/L) <= 75.0 and Concentration (mg/L) > 37.5 and Zeta potential (mV) <= -11.6                               | 2.9223  | 0.0655 | 0.7229 | 3  |
| Concentration (mg/L) <= 75.0 and Hydrodynamic diameter (nm) > 276.06999 and Zeta potential (mV) <= 21.87                    | 1.5546  | 0.3155 | 0.7224 | 2  |
| Concentration (mg/L) <= 37.5 and Hydrodynamic diameter (nm) > 415.67999                                                     | -2.5049 | 0.0893 | 0.7143 | 2  |
| TEM size (nm) > 19.155 and BET surface area (m <sup>2</sup> /g) > 98.515                                                    | 1.9673  | 0.1429 | 0.6884 | 7  |
| Concentration (mg/L) > 150.0 and TEM size (nm) > 14.68 and Zeta potential (mV) <= 23.25                                     | 1.8686  | 0.1607 | 0.6863 | 10 |
| BET surface area (m <sup>2</sup> /g) > 107.75                                                                               | 1.4815  | 0.2917 | 0.6734 | 7  |
| Concentration (mg/L) <= 37.5 and Hydrodynamic diameter (nm) <= 263.34999 and Zeta potential (mV) >                          | 3.6090  | 0.0357 | 0.6698 | 8  |

|                                                                                                                                |         |        |        |    |
|--------------------------------------------------------------------------------------------------------------------------------|---------|--------|--------|----|
| -13.03                                                                                                                         |         |        |        |    |
| Concentration (mg/L) <= 150.0 and Hydrodynamic diameter (nm) <= 363.47 and Zeta potential (mV) <= 26.17                        | -1.4680 | 0.2917 | 0.6672 | 2  |
| Concentration (mg/L) <= 75.0 and Concentration (mg/L) > 37.5 and Zeta potential (mV) <= -11.6                                  | 2.4925  | 0.0714 | 0.6419 | 10 |
| Concentration (mg/L) <= 150.0 and Concentration (mg/L) > 75.0 and Zeta potential (mV) <= -11.6                                 | -2.5547 | 0.0655 | 0.6319 | 8  |
| Concentration (mg/L) > 37.5 and Hydrodynamic diameter (nm) > 415.67999                                                         | 1.4459  | 0.2440 | 0.6211 | 2  |
| Concentration (mg/L) <= 75.0 and Concentration (mg/L) > 37.5 and Zeta potential (mV) <= -11.6                                  | 2.4296  | 0.0655 | 0.6010 | 4  |
| Concentration (mg/L) <= 37.5 and TEM size (nm) <= 38.345 and TEM size (nm) > 28.685                                            | -2.5182 | 0.0595 | 0.5958 | 8  |
| Concentration (mg/L) <= 37.5 and TEM size (nm) > 38.345 and BET surface area (m <sup>2</sup> /g) > 4.39                        | 2.5809  | 0.0536 | 0.5811 | 3  |
| Concentration (mg/L) <= 37.5 and Zeta potential (mV) <= -13.03                                                                 | -2.3380 | 0.0655 | 0.5783 | 8  |
| Concentration (mg/L) > 75.0 and BET surface area (m <sup>2</sup> /g) <= 27.46                                                  | -1.6669 | 0.1310 | 0.5623 | 5  |
| Concentration (mg/L) > 150.0 and Hydrodynamic diameter (nm) > 344.45 and BET surface area (m <sup>2</sup> /g) <= 139.6         | -1.7417 | 0.1131 | 0.5516 | 2  |
| Concentration (mg/L) <= 37.5 and Hydrodynamic diameter (nm) > 263.34999 and Zeta potential (mV) > -4.945                       | -1.8111 | 0.1012 | 0.5462 | 5  |
| Concentration (mg/L) <= 75.0 and Concentration (mg/L) > 37.5 and Hydrodynamic diameter (nm) <= 220.665                         | -4.1230 | 0.0179 | 0.5460 | 7  |
| Concentration (mg/L) <= 37.5 and TEM size (nm) <= 38.345 and TEM size (nm) > 28.685                                            | -2.3560 | 0.0536 | 0.5305 | 5  |
| Hydrodynamic diameter (nm) > 312.84999 and Zeta potential (mV) <= 5.565 and Zeta potential (mV) > -25.835                      | -1.0726 | 0.4107 | 0.5277 | 2  |
| Concentration (mg/L) <= 150.0 and Concentration (mg/L) > 75.0 and Zeta potential (mV) <= -11.6                                 | -2.0465 | 0.0714 | 0.5270 | 7  |
| Concentration (mg/L) <= 75.0 and Concentration (mg/L) > 37.5 and Zeta potential (mV) <= -11.6                                  | 2.0242  | 0.0714 | 0.5213 | 6  |
| Concentration (mg/L) <= 150.0 and Concentration (mg/L) > 37.5 and Hydrodynamic diameter (nm) > 900.76498                       | 3.0610  | 0.0298 | 0.5201 | 3  |
| Concentration (mg/L) <= 37.5 and Hydrodynamic diameter (nm) <= 263.34999 and BET surface area (m <sup>2</sup> /g) <= 169.06499 | 2.9380  | 0.0298 | 0.4992 | 7  |

|                                                                                                                                       |         |        |        |    |
|---------------------------------------------------------------------------------------------------------------------------------------|---------|--------|--------|----|
| Concentration (mg/L) > 150.0 and Hydrodynamic diameter (nm) <= 900.76498 and Zeta potential (mV) > 23.25                              | -2.9258 | 0.0298 | 0.4972 | 8  |
| Concentration (mg/L) <= 37.5 and Hydrodynamic diameter (nm) > 263.34999                                                               | -1.2868 | 0.1786 | 0.4928 | 6  |
| Concentration (mg/L) <= 150.0 and Hydrodynamic diameter (nm) <= 363.47 and Zeta potential (mV) <= 23.55                               | -1.0959 | 0.2798 | 0.4919 | 8  |
| Concentration (mg/L) > 150.0 and Zeta potential (mV) > -4.115 and BET surface area (m2/g) <= 27.46                                    | 2.1423  | 0.0536 | 0.4824 | 1  |
| Concentration (mg/L) <= 150.0 and TEM size (nm) > 29.155 and Hydrodynamic diameter (nm) <= 363.47                                     | -1.1969 | 0.2024 | 0.4809 | 1  |
| Concentration (mg/L) > 150.0 and Hydrodynamic diameter (nm) > 900.76498                                                               | -3.1389 | 0.0238 | 0.4785 | 7  |
| Concentration (mg/L) > 150.0 and BET surface area (m2/g) > 127.18999                                                                  | 2.0765  | 0.0536 | 0.4676 | 2  |
| Hydrodynamic diameter (nm) > 263.34999 and BET surface area (m2/g) <= 139.6                                                           | -1.0166 | 0.7024 | 0.4648 | 3  |
| Concentration (mg/L) <= 75.0 and Concentration (mg/L) > 37.5 and Hydrodynamic diameter (nm) > 220.665                                 | 1.1113  | 0.2202 | 0.4605 | 5  |
| Concentration (mg/L) <= 37.5 and TEM size (nm) <= 38.345 and TEM size (nm) > 28.685                                                   | -1.9419 | 0.0595 | 0.4595 | 4  |
| Concentration (mg/L) <= 37.5 and TEM size (nm) <= 38.345 and TEM size (nm) > 28.685                                                   | -1.8511 | 0.0655 | 0.4579 | 3  |
| Concentration (mg/L) <= 37.5 and TEM size (nm) <= 113.04 and Hydrodynamic diameter (nm) > 263.34999 and Zeta potential (mV) > -7.22   | -1.6251 | 0.0833 | 0.4492 | 10 |
| Zeta potential (mV) > -25.835 and BET surface area (m2/g) > 45.705                                                                    | -0.8934 | 0.5179 | 0.4464 | 2  |
| BET surface area (m2/g) <= 4.39                                                                                                       | 1.7747  | 0.0655 | 0.4390 | 7  |
| Concentration (mg/L) <= 37.5 and Hydrodynamic diameter (nm) <= 312.84999 and Zeta potential (mV) <= 19.25                             | -2.3516 | 0.0357 | 0.4364 | 2  |
| Concentration (mg/L) <= 150.0 and Hydrodynamic diameter (nm) > 390.5                                                                  | 0.9206  | 0.3214 | 0.4300 | 6  |
| Concentration (mg/L) > 150.0 and TEM size (nm) <= 32.04 and Zeta potential (mV) > -9.325                                              | -1.4174 | 0.1012 | 0.4275 | 10 |
| Concentration (mg/L) > 75.0 and BET surface area (m2/g) <= 181.475                                                                    | 0.8462  | 0.4583 | 0.4216 | 3  |
| Concentration (mg/L) > 37.5 and TEM size (nm) <= 113.04 and Hydrodynamic diameter (nm) > 344.45 and BET surface area (m2/g) <= 107.75 | -0.9062 | 0.3036 | 0.4167 | 10 |
| Concentration (mg/L) > 37.5 and Hydrodynamic                                                                                          | -0.9264 | 0.2738 | 0.4131 | 5  |

|                                                                                                          |         |        |        |   |
|----------------------------------------------------------------------------------------------------------|---------|--------|--------|---|
| diameter (nm) <= 736.38501 and Hydrodynamic diameter (nm) > 344.45                                       |         |        |        |   |
| Concentration (mg/L) <= 150.0 and Hydrodynamic diameter (nm) > 363.47                                    | 0.8463  | 0.3810 | 0.4110 | 1 |
| Concentration (mg/L) <= 37.5 and TEM size (nm) <= 13.07                                                  | 3.0735  | 0.0179 | 0.4070 | 2 |
| Concentration (mg/L) > 150.0 and TEM size (nm) <= 28.685 and Zeta potential (mV) <= -9.325               | 1.7116  | 0.0595 | 0.4050 | 3 |
| Concentration (mg/L) <= 37.5 and TEM size (nm) <= 33.23 and Zeta potential (mV) > -25.835                | -1.1318 | 0.1488 | 0.4028 | 4 |
| Concentration (mg/L) <= 150.0 and Hydrodynamic diameter (nm) > 363.47 and Zeta potential (mV) <= 26.17   | 0.8431  | 0.3452 | 0.4009 | 2 |
| BET surface area (m2/g) <= 107.75 and BET surface area (m2/g) > 45.705                                   | -0.8646 | 0.3036 | 0.3975 | 6 |
| Concentration (mg/L) <= 37.5 and TEM size (nm) <= 38.345 and Zeta potential (mV) > -25.835               | -1.0807 | 0.1607 | 0.3969 | 1 |
| Concentration (mg/L) <= 150.0 and Concentration (mg/L) > 75.0 and Hydrodynamic diameter (nm) > 415.67999 | 1.5306  | 0.0714 | 0.3942 | 2 |
| Concentration (mg/L) <= 150.0 and Concentration (mg/L) > 75.0 and BET surface area (m2/g) > 181.475      | -2.5792 | 0.0238 | 0.3932 | 8 |
| Concentration (mg/L) <= 75.0 and Hydrodynamic diameter (nm) > 415.67999                                  | -0.9867 | 0.1845 | 0.3827 | 2 |
| Concentration (mg/L) <= 75.0 and Hydrodynamic diameter (nm) <= 363.47                                    | 0.8810  | 0.2500 | 0.3815 | 7 |
| Concentration (mg/L) > 75.0 and BET surface area (m2/g) <= 181.475 and BET surface area (m2/g) > 92.805  | 1.0542  | 0.1548 | 0.3813 | 5 |
| Concentration (mg/L) > 150.0 and Hydrodynamic diameter (nm) <= 263.34999 and Zeta potential (mV) > 26.17 | -2.4945 | 0.0238 | 0.3803 | 7 |
| Concentration (mg/L) <= 150.0 and TEM size (nm) <= 13.07                                                 | 1.7827  | 0.0476 | 0.3797 | 8 |
| Concentration (mg/L) <= 37.5 and Hydrodynamic diameter (nm) <= 263.34999 and Zeta potential (mV) > 0.865 | 2.2336  | 0.0298 | 0.3795 | 7 |
| Concentration (mg/L) <= 37.5 and TEM size (nm) <= 38.345                                                 | -0.9387 | 0.2024 | 0.3771 | 8 |
| Concentration (mg/L) > 150.0 and Hydrodynamic diameter (nm) <= 363.47 and Zeta potential (mV) <= 23.55   | 1.2977  | 0.0893 | 0.3700 | 8 |
| Concentration (mg/L) > 150.0 and TEM size (nm) > 14.68 and Zeta potential (mV) <= 23.25                  | 1.0180  | 0.1488 | 0.3623 | 9 |

|                                                                                                                                                     |         |        |        |    |
|-----------------------------------------------------------------------------------------------------------------------------------------------------|---------|--------|--------|----|
| Concentration (mg/L) <= 75.0 and BET surface area (m <sup>2</sup> /g) <= 15.31                                                                      | 1.1990  | 0.1012 | 0.3616 | 3  |
| Concentration (mg/L) <= 150.0 and Concentration (mg/L) > 75.0 and Hydrodynamic diameter (nm) > 900.76498                                            | 3.3250  | 0.0119 | 0.3606 | 8  |
| Concentration (mg/L) > 150.0 and TEM size (nm) > 32.04 and Zeta potential (mV) > -25.835                                                            | 1.0629  | 0.1310 | 0.3586 | 4  |
| Concentration (mg/L) > 37.5 and TEM size (nm) <= 113.04 and Hydrodynamic diameter (nm) <= 344.45 and BET surface area (m <sup>2</sup> /g) <= 107.75 | 0.9441  | 0.1726 | 0.3568 | 10 |
| Hydrodynamic diameter (nm) > 220.665 and Zeta potential (mV) > -25.835 and BET surface area (m <sup>2</sup> /g) > 45.705                            | -0.7201 | 0.4286 | 0.3564 | 7  |
| Concentration (mg/L) > 75.0 and Hydrodynamic diameter (nm) <= 220.665                                                                               | 1.6662  | 0.0476 | 0.3548 | 8  |
| Concentration (mg/L) > 75.0 and Hydrodynamic diameter (nm) <= 220.665                                                                               | 2.0434  | 0.0298 | 0.3472 | 7  |
| Concentration (mg/L) <= 150.0 and TEM size (nm) > 32.04                                                                                             | -0.7471 | 0.2976 | 0.3416 | 2  |
| Concentration (mg/L) > 75.0 and TEM size (nm) <= 113.04 and Zeta potential (mV) <= -11.6                                                            | -0.9130 | 0.1667 | 0.3403 | 6  |
| Concentration (mg/L) <= 150.0 and TEM size (nm) > 19.155 and Hydrodynamic diameter (nm) > 363.47 and Zeta potential (mV) <= 26.17                   | 0.8948  | 0.1726 | 0.3382 | 2  |
| Concentration (mg/L) <= 75.0 and Zeta potential (mV) <= -11.6                                                                                       | 0.8994  | 0.1607 | 0.3303 | 8  |
| Concentration (mg/L) <= 75.0 and Concentration (mg/L) > 37.5 and Hydrodynamic diameter (nm) <= 220.665                                              | -2.4769 | 0.0179 | 0.3280 | 8  |
| Concentration (mg/L) <= 75.0 and Zeta potential (mV) <= -13.03 and BET surface area (m <sup>2</sup> /g) <= 45.705                                   | -1.6300 | 0.0417 | 0.3257 | 8  |
| Concentration (mg/L) <= 37.5 and Hydrodynamic diameter (nm) <= 900.76498 and Hydrodynamic diameter (nm) > 344.45                                    | 0.9632  | 0.1310 | 0.3249 | 4  |
| Concentration (mg/L) <= 150.0 and TEM size (nm) <= 92.525 and Hydrodynamic diameter (nm) > 363.47                                                   | 0.6892  | 0.3155 | 0.3203 | 4  |
| Zeta potential (mV) > -25.835 and BET surface area (m <sup>2</sup> /g) > 45.705                                                                     | -0.6397 | 0.5179 | 0.3196 | 3  |
| Concentration (mg/L) > 150.0 and TEM size (nm) <= 21.72 and TEM size (nm) > 14.68                                                                   | 1.3958  | 0.0536 | 0.3143 | 4  |
| Concentration (mg/L) <= 75.0 and Concentration (mg/L) > 37.5 and Zeta potential (mV) <= -11.6                                                       | 1.1319  | 0.0833 | 0.3128 | 9  |
| Concentration (mg/L) <= 150.0 and TEM size (nm) <= 29.155 and Zeta potential (mV) > 26.17                                                           | 1.2638  | 0.0655 | 0.3126 | 7  |

|                                                                                                                                                 |         |        |        |   |
|-------------------------------------------------------------------------------------------------------------------------------------------------|---------|--------|--------|---|
| Concentration (mg/L) <= 150.0 and Concentration (mg/L) > 37.5 and Hydrodynamic diameter (nm) > 736.38501                                        | 1.0392  | 0.0952 | 0.3051 | 5 |
| Concentration (mg/L) <= 150.0 and Concentration (mg/L) > 37.5 and Zeta potential (mV) <= -25.835                                                | -1.5200 | 0.0417 | 0.3037 | 7 |
| Concentration (mg/L) > 150.0 and TEM size (nm) <= 28.685 and Zeta potential (mV) > -9.325                                                       | -1.2174 | 0.0655 | 0.3011 | 3 |
| Concentration (mg/L) <= 37.5 and Hydrodynamic diameter (nm) <= 263.34999 and BET surface area (m <sup>2</sup> /g) <= 169.06499                  | 1.5056  | 0.0417 | 0.3009 | 3 |
| BET surface area (m <sup>2</sup> /g) <= 127.18999 and BET surface area (m <sup>2</sup> /g) > 45.705                                             | -0.6239 | 0.3631 | 0.3000 | 8 |
| Concentration (mg/L) <= 150.0 and Concentration (mg/L) > 75.0 and Zeta potential (mV) > -4.945 and BET surface area (m <sup>2</sup> /g) > 33.53 | 1.0464  | 0.0893 | 0.2984 | 9 |
| Concentration (mg/L) > 150.0 and Hydrodynamic diameter (nm) <= 363.47 and Hydrodynamic diameter (nm) > 263.34999                                | 1.1118  | 0.0774 | 0.2971 | 4 |
| Concentration (mg/L) <= 150.0 and Hydrodynamic diameter (nm) > 363.47 and Zeta potential (mV) <= 5.565                                          | 0.6666  | 0.2619 | 0.2931 | 9 |
| Concentration (mg/L) > 150.0 and Hydrodynamic diameter (nm) > 363.47                                                                            | -0.8803 | 0.1250 | 0.2911 | 6 |
| Concentration (mg/L) <= 75.0 and BET surface area (m <sup>2</sup> /g) <= 4.39                                                                   | 1.7044  | 0.0298 | 0.2896 | 8 |
| Concentration (mg/L) > 150.0 and Zeta potential (mV) <= 35.27 and Zeta potential (mV) > 26.17                                                   | -1.8827 | 0.0238 | 0.2870 | 6 |
| Concentration (mg/L) <= 75.0 and Zeta potential (mV) <= -16.015                                                                                 | 1.1557  | 0.0655 | 0.2859 | 2 |
| Concentration (mg/L) > 37.5 and Zeta potential (mV) <= -9.325 and Zeta potential (mV) > -13.03                                                  | -0.9151 | 0.1071 | 0.2830 | 4 |
| TEM size (nm) <= 32.04 and Zeta potential (mV) > -25.835                                                                                        | -0.5651 | 0.4583 | 0.2816 | 4 |
| Zeta potential (mV) > -25.835 and BET surface area (m <sup>2</sup> /g) > 45.705                                                                 | -0.5568 | 0.5060 | 0.2784 | 5 |
| Concentration (mg/L) <= 37.5 and TEM size (nm) <= 73.455 and TEM size (nm) > 38.345                                                             | 1.6047  | 0.0298 | 0.2727 | 6 |
| Hydrodynamic diameter (nm) > 390.5                                                                                                              | 0.5422  | 0.4286 | 0.2683 | 6 |
| Concentration (mg/L) <= 75.0 and TEM size (nm) <= 73.455 and BET surface area (m <sup>2</sup> /g) <= 45.705                                     | 0.7769  | 0.1369 | 0.2670 | 6 |
| Concentration (mg/L) > 37.5 and TEM size (nm) <= 38.345 and BET surface area (m <sup>2</sup> /g) > 107.75                                       | 0.7178  | 0.1607 | 0.2636 | 1 |
| Concentration (mg/L) > 150.0 and Hydrodynamic diameter (nm) > 840.285                                                                           | -1.2342 | 0.0476 | 0.2628 | 1 |

|                                                                                                                                                             |         |        |        |    |
|-------------------------------------------------------------------------------------------------------------------------------------------------------------|---------|--------|--------|----|
| Concentration (mg/L) <= 150.0 and Concentration (mg/L) > 75.0 and TEM size (nm) > 14.68 and Zeta potential (mV) <= 26.17                                    | -0.7045 | 0.1667 | 0.2626 | 9  |
| Concentration (mg/L) <= 150.0 and Hydrodynamic diameter (nm) > 363.47                                                                                       | 0.5485  | 0.3512 | 0.2618 | 3  |
| Concentration (mg/L) <= 75.0 and Zeta potential (mV) > -13.03 and BET surface area (m <sup>2</sup> /g) <= 45.705                                            | 0.6441  | 0.2083 | 0.2616 | 9  |
| Concentration (mg/L) > 150.0 and BET surface area (m <sup>2</sup> /g) <= 27.46                                                                              | 1.0361  | 0.0655 | 0.2563 | 6  |
| Concentration (mg/L) <= 75.0 and Zeta potential (mV) > -13.03 and BET surface area (m <sup>2</sup> /g) <= 45.705                                            | 0.6435  | 0.1964 | 0.2557 | 8  |
| Concentration (mg/L) > 150.0 and Hydrodynamic diameter (nm) > 263.34999 and Zeta potential (mV) > 5.565                                                     | 1.0667  | 0.0595 | 0.2524 | 5  |
| Concentration (mg/L) <= 37.5 and TEM size (nm) <= 38.345 and Zeta potential (mV) > -25.835                                                                  | -0.6488 | 0.1845 | 0.2517 | 8  |
| Concentration (mg/L) > 150.0 and TEM size (nm) > 38.345                                                                                                     | 1.0585  | 0.0595 | 0.2504 | 8  |
| Concentration (mg/L) <= 150.0 and Concentration (mg/L) > 75.0 and Hydrodynamic diameter (nm) <= 543.41499                                                   | -0.6318 | 0.1905 | 0.2481 | 2  |
| Concentration (mg/L) <= 75.0 and Hydrodynamic diameter (nm) > 363.47 and Zeta potential (mV) <= -10.655                                                     | 1.0026  | 0.0655 | 0.2480 | 10 |
| Concentration (mg/L) <= 150.0 and Concentration (mg/L) > 75.0 and TEM size (nm) <= 47.84 and Zeta potential (mV) <= 35.27 and Zeta potential (mV) > -9.325  | 0.7641  | 0.1190 | 0.2474 | 10 |
| Concentration (mg/L) <= 75.0 and Hydrodynamic diameter (nm) <= 840.285 and Zeta potential (mV) > -25.835 and BET surface area (m <sup>2</sup> /g) <= 45.705 | 0.5962  | 0.2143 | 0.2446 | 1  |
| BET surface area (m <sup>2</sup> /g) > 127.18999                                                                                                            | 0.5873  | 0.2202 | 0.2434 | 8  |
| TEM size (nm) <= 113.04 and Hydrodynamic diameter (nm) > 263.34999 and Zeta potential (mV) > -11.6                                                          | -0.4862 | 0.5060 | 0.2431 | 6  |
| Concentration (mg/L) <= 75.0 and BET surface area (m <sup>2</sup> /g) <= 45.705 and BET surface area (m <sup>2</sup> /g) > 4.39                             | 0.6210  | 0.1845 | 0.2409 | 4  |
| Concentration (mg/L) <= 150.0 and Zeta potential (mV) <= 35.27 and BET surface area (m <sup>2</sup> /g) <= 45.705                                           | 0.5692  | 0.2321 | 0.2403 | 10 |
| Concentration (mg/L) <= 150.0 and Hydrodynamic diameter (nm) <= 363.47 and Zeta potential (mV) <= 23.55                                                     | -0.5405 | 0.2679 | 0.2394 | 5  |
| Concentration (mg/L) <= 37.5 and TEM size (nm) <= 38.345 and TEM size (nm) > 28.685                                                                         | -1.1189 | 0.0476 | 0.2383 | 6  |
| Concentration (mg/L) <= 37.5 and TEM size (nm) <=                                                                                                           | -0.9480 | 0.0655 | 0.2345 | 7  |



|                                                                                                                                                                       |         |        |        |    |
|-----------------------------------------------------------------------------------------------------------------------------------------------------------------------|---------|--------|--------|----|
| 38.345 and TEM size (nm) > 28.685                                                                                                                                     |         |        |        |    |
| Concentration (mg/L) <= 75.0 and BET surface area (m <sup>2</sup> /g) <= 27.46                                                                                        | 0.6671  | 0.1429 | 0.2334 | 5  |
| Concentration (mg/L) > 150.0 and TEM size (nm) <= 28.685 and Zeta potential (mV) > -9.325 and BET surface area (m <sup>2</sup> /g) > 27.46                            | -0.9050 | 0.0714 | 0.2331 | 9  |
| Concentration (mg/L) <= 150.0 and Concentration (mg/L) > 37.5 and Zeta potential (mV) > -4.945 and BET surface area (m <sup>2</sup> /g) <= 127.18999                  | 0.5391  | 0.2440 | 0.2315 | 10 |
| Concentration (mg/L) > 150.0 and TEM size (nm) > 29.155 and Hydrodynamic diameter (nm) <= 357.45                                                                      | 0.8969  | 0.0714 | 0.2310 | 9  |
| Concentration (mg/L) <= 150.0 and Zeta potential (mV) <= 35.27 and Zeta potential (mV) > 26.17                                                                        | 0.8927  | 0.0714 | 0.2299 | 3  |
| Concentration (mg/L) <= 75.0 and Concentration (mg/L) > 37.5 and Zeta potential (mV) > 35.27                                                                          | 1.7255  | 0.0179 | 0.2285 | 3  |
| Concentration (mg/L) > 150.0 and Hydrodynamic diameter (nm) > 363.47 and Zeta potential (mV) > -25.835                                                                | -0.6756 | 0.1310 | 0.2279 | 10 |
| Concentration (mg/L) > 150.0 and Hydrodynamic diameter (nm) <= 363.47 and Hydrodynamic diameter (nm) > 276.06999 and Zeta potential (mV) > -25.835                    | 1.0695  | 0.0476 | 0.2278 | 1  |
| Concentration (mg/L) > 75.0 and Hydrodynamic diameter (nm) > 220.665                                                                                                  | -0.4543 | 0.4702 | 0.2267 | 7  |
| Concentration (mg/L) <= 37.5 and TEM size (nm) <= 38.345 and TEM size (nm) > 13.07 and Zeta potential (mV) > -25.835 and BET surface area (m <sup>2</sup> /g) > 56.85 | -0.9062 | 0.0655 | 0.2242 | 10 |
| Concentration (mg/L) <= 150.0 and TEM size (nm) > 14.68 and Zeta potential (mV) <= 26.17                                                                              | -0.4470 | 0.5357 | 0.2229 | 1  |
| Concentration (mg/L) <= 37.5 and TEM size (nm) > 21.72 and Hydrodynamic diameter (nm) <= 263.34999                                                                    | 1.4604  | 0.0238 | 0.2227 | 4  |
| Concentration (mg/L) <= 75.0 and Concentration (mg/L) > 37.5 and Hydrodynamic diameter (nm) <= 220.665                                                                | -1.4558 | 0.0238 | 0.2219 | 4  |
| Concentration (mg/L) <= 75.0 and Zeta potential (mV) > -25.835 and BET surface area (m <sup>2</sup> /g) <= 45.705                                                     | 0.5376  | 0.2143 | 0.2206 | 1  |
| Hydrodynamic diameter (nm) > 344.45 and Zeta potential (mV) > -22.85                                                                                                  | -0.4409 | 0.5238 | 0.2202 | 1  |
| Concentration (mg/L) <= 150.0 and Hydrodynamic diameter (nm) <= 363.47 and Hydrodynamic diameter (nm) > 263.34999                                                     | -0.5474 | 0.2024 | 0.2199 | 10 |
| Concentration (mg/L) > 150.0 and TEM size (nm) <= 92.525 and Hydrodynamic diameter (nm) > 363.47                                                                      | -0.7057 | 0.1071 | 0.2183 | 4  |
| Concentration (mg/L) <= 150.0 and Zeta potential (mV) <= 35.27 and Zeta potential (mV) > 26.17                                                                        | 1.0901  | 0.0417 | 0.2178 | 4  |

|                                                                                                                                                                               |         |        |        |    |
|-------------------------------------------------------------------------------------------------------------------------------------------------------------------------------|---------|--------|--------|----|
| Concentration (mg/L) <= 37.5 and Hydrodynamic diameter (nm) <= 900.76498 and Hydrodynamic diameter (nm) > 363.47                                                              | 0.7386  | 0.0952 | 0.2168 | 6  |
| Concentration (mg/L) > 150.0 and Hydrodynamic diameter (nm) > 363.47                                                                                                          | -0.6657 | 0.1190 | 0.2156 | 8  |
| Concentration (mg/L) <= 37.5 and Hydrodynamic diameter (nm) > 263.34999 and Zeta potential (mV) > -9.325                                                                      | -0.6064 | 0.1429 | 0.2122 | 9  |
| Concentration (mg/L) <= 150.0 and Hydrodynamic diameter (nm) <= 363.47 and Zeta potential (mV) <= 26.17                                                                       | -0.4788 | 0.2679 | 0.2120 | 5  |
| Concentration (mg/L) <= 37.5 and Hydrodynamic diameter (nm) <= 900.76498 and Zeta potential (mV) > -13.03                                                                     | 0.5492  | 0.1786 | 0.2104 | 5  |
| Concentration (mg/L) <= 150.0 and Hydrodynamic diameter (nm) <= 363.47 and Hydrodynamic diameter (nm) > 263.34999                                                             | -0.4985 | 0.2262 | 0.2086 | 4  |
| Concentration (mg/L) > 37.5 and TEM size (nm) <= 38.345                                                                                                                       | 0.4132  | 0.5179 | 0.2065 | 8  |
| Concentration (mg/L) <= 150.0 and TEM size (nm) > 19.155 and Hydrodynamic diameter (nm) <= 363.47 and Hydrodynamic diameter (nm) > 263.34999                                  | -0.4842 | 0.2024 | 0.1945 | 10 |
| Concentration (mg/L) <= 37.5 and Hydrodynamic diameter (nm) <= 900.76498 and BET surface area (m <sup>2</sup> /g) > 33.53                                                     | 0.5362  | 0.1488 | 0.1908 | 5  |
| Concentration (mg/L) > 37.5 and TEM size (nm) <= 73.455 and Hydrodynamic diameter (nm) <= 900.76498 and Hydrodynamic diameter (nm) > 344.45 and Zeta potential (mV) > -25.835 | -0.4372 | 0.2500 | 0.1893 | 9  |
| Concentration (mg/L) <= 150.0 and Hydrodynamic diameter (nm) <= 363.47                                                                                                        | -0.3820 | 0.4167 | 0.1883 | 3  |
| Zeta potential (mV) > -25.835 and BET surface area (m <sup>2</sup> /g) > 92.805                                                                                               | -0.4097 | 0.2917 | 0.1862 | 5  |
| Concentration (mg/L) <= 75.0 and Zeta potential (mV) <= -25.835                                                                                                               | 1.2204  | 0.0238 | 0.1860 | 3  |
| Concentration (mg/L) > 37.5 and Zeta potential (mV) <= -4.945 and Zeta potential (mV) > -13.03                                                                                | -0.5098 | 0.1548 | 0.1844 | 5  |
| Concentration (mg/L) <= 150.0 and Hydrodynamic diameter (nm) <= 363.47 and Zeta potential (mV) > 23.55                                                                        | 0.5564  | 0.1250 | 0.1840 | 8  |
| Concentration (mg/L) > 75.0 and Zeta potential (mV) <= -4.945                                                                                                                 | -0.4195 | 0.2560 | 0.1831 | 6  |
| Concentration (mg/L) > 37.5 and Zeta potential (mV) <= 35.27 and Zeta potential (mV) > -13.03                                                                                 | -0.3636 | 0.5298 | 0.1815 | 5  |

|                                                                                                                                                                                     |         |        |        |    |
|-------------------------------------------------------------------------------------------------------------------------------------------------------------------------------------|---------|--------|--------|----|
| Concentration (mg/L) <= 150.0 and Zeta potential (mV) > 26.17                                                                                                                       | 0.5464  | 0.1250 | 0.1807 | 8  |
| TEM size (nm) <= 24.155 and TEM size (nm) > 13.07 and Zeta potential (mV) > -25.835                                                                                                 | -0.3946 | 0.2976 | 0.1804 | 8  |
| Concentration (mg/L) <= 150.0 and TEM size (nm) <= 29.155 and Zeta potential (mV) > 26.17                                                                                           | 0.7005  | 0.0714 | 0.1804 | 3  |
| BET surface area (m2/g) <= 149.7 and BET surface area (m2/g) > 45.705                                                                                                               | -0.3621 | 0.4345 | 0.1795 | 2  |
| Concentration (mg/L) <= 150.0 and TEM size (nm) > 19.155 and Hydrodynamic diameter (nm) <= 363.47 and Hydrodynamic diameter (nm) > 263.34999                                        | -0.4171 | 0.2381 | 0.1776 | 9  |
| TEM size (nm) > 19.155 and BET surface area (m2/g) > 98.515                                                                                                                         | 0.5305  | 0.1250 | 0.1754 | 1  |
| Concentration (mg/L) <= 150.0 and Concentration (mg/L) > 75.0 and Hydrodynamic diameter (nm) <= 543.41499 and Hydrodynamic diameter (nm) > 220.665 and Zeta potential (mV) <= 26.17 | -0.5246 | 0.1250 | 0.1735 | 10 |
| TEM size (nm) <= 24.155 and Zeta potential (mV) > -25.835                                                                                                                           | -0.3544 | 0.3750 | 0.1716 | 5  |
| Concentration (mg/L) <= 37.5 and Hydrodynamic diameter (nm) <= 263.34999 and BET surface area (m2/g) > 169.06499                                                                    | -1.1021 | 0.0238 | 0.1680 | 7  |
| Concentration (mg/L) <= 37.5 and Zeta potential (mV) <= 35.27 and Zeta potential (mV) > -13.03                                                                                      | 0.4350  | 0.1786 | 0.1666 | 5  |
| Concentration (mg/L) > 37.5 and TEM size (nm) <= 73.455 and Zeta potential (mV) <= 26.17 and Zeta potential (mV) > -13.03                                                           | -0.3436 | 0.3690 | 0.1658 | 9  |
| Concentration (mg/L) <= 75.0 and TEM size (nm) <= 24.155 and Zeta potential (mV) <= -14.585                                                                                         | 0.6694  | 0.0655 | 0.1656 | 2  |
| Concentration (mg/L) > 75.0 and Hydrodynamic diameter (nm) > 363.47 and BET surface area (m2/g) <= 73.47                                                                            | -0.5469 | 0.1012 | 0.1649 | 4  |
| BET surface area (m2/g) <= 181.475 and BET surface area (m2/g) > 92.805                                                                                                             | -0.3643 | 0.2857 | 0.1646 | 7  |
| Concentration (mg/L) > 37.5 and BET surface area (m2/g) <= 45.705                                                                                                                   | 0.3447  | 0.3512 | 0.1645 | 6  |
| Concentration (mg/L) <= 150.0 and TEM size (nm) > 14.68 and Zeta potential (mV) > 26.17                                                                                             | 0.5415  | 0.1012 | 0.1633 | 1  |
| Concentration (mg/L) > 150.0 and TEM size (nm) > 29.155 and Hydrodynamic diameter (nm) <= 344.45                                                                                    | 0.5671  | 0.0893 | 0.1617 | 4  |
| Concentration (mg/L) <= 37.5 and TEM size (nm) <= 47.84 and Hydrodynamic diameter (nm) > 263.34999                                                                                  | -0.4606 | 0.1429 | 0.1612 | 9  |
| Concentration (mg/L) > 150.0 and Hydrodynamic diameter (nm) > 363.47 and BET surface area (m2/g) >                                                                                  | -0.5159 | 0.1071 | 0.1596 | 4  |

|                                                                                                                                              |         |        |        |    |
|----------------------------------------------------------------------------------------------------------------------------------------------|---------|--------|--------|----|
| 5.01                                                                                                                                         |         |        |        |    |
| Concentration (mg/L) <= 37.5 and TEM size (nm) <= 28.685 and TEM size (nm) > 19.155                                                          | 0.6636  | 0.0595 | 0.1570 | 10 |
| Zeta potential (mV) > -14.585 and BET surface area (m2/g) > 45.705                                                                           | -0.3126 | 0.4345 | 0.1549 | 2  |
| Concentration (mg/L) <= 150.0 and Concentration (mg/L) > 75.0 and Hydrodynamic diameter (nm) > 840.285                                       | 0.8300  | 0.0357 | 0.1540 | 2  |
| Concentration (mg/L) <= 37.5 and TEM size (nm) <= 113.04 and Hydrodynamic diameter (nm) > 263.34999 and Zeta potential (mV) > -4.945         | -0.4893 | 0.1071 | 0.1513 | 9  |
| Hydrodynamic diameter (nm) > 220.665 and Zeta potential (mV) > -25.835 and BET surface area (m2/g) > 45.705                                  | -0.3022 | 0.4405 | 0.1500 | 5  |
| TEM size (nm) <= 24.155 and Zeta potential (mV) > -25.835                                                                                    | -0.3126 | 0.3512 | 0.1492 | 6  |
| Concentration (mg/L) <= 150.0 and Zeta potential (mV) <= -11.6                                                                               | 0.3611  | 0.2143 | 0.1482 | 2  |
| Concentration (mg/L) > 150.0 and Hydrodynamic diameter (nm) > 263.34999 and Zeta potential (mV) <= -13.03                                    | 0.7971  | 0.0357 | 0.1479 | 4  |
| Concentration (mg/L) <= 37.5 and Hydrodynamic diameter (nm) <= 263.34999 and Zeta potential (mV) > 0.865                                     | 0.8550  | 0.0298 | 0.1453 | 5  |
| Concentration (mg/L) <= 150.0 and Hydrodynamic diameter (nm) <= 736.38501 and Zeta potential (mV) <= 19.25 and Zeta potential (mV) > -25.835 | -0.3077 | 0.3155 | 0.1430 | 10 |
| Hydrodynamic diameter (nm) <= 840.285 and BET surface area (m2/g) <= 15.31                                                                   | 0.3609  | 0.1905 | 0.1417 | 2  |
| Concentration (mg/L) > 150.0 and Hydrodynamic diameter (nm) <= 363.47 and Hydrodynamic diameter (nm) > 263.34999                             | 0.6250  | 0.0536 | 0.1407 | 5  |
| Concentration (mg/L) <= 75.0 and Zeta potential (mV) > -11.6                                                                                 | -0.2908 | 0.3452 | 0.1383 | 6  |
| Concentration (mg/L) <= 37.5 and TEM size (nm) <= 38.345 and Hydrodynamic diameter (nm) > 263.34999                                          | -0.3914 | 0.1429 | 0.1369 | 9  |
| Concentration (mg/L) > 150.0 and TEM size (nm) <= 13.07                                                                                      | -1.0340 | 0.0179 | 0.1369 | 8  |
| TEM size (nm) <= 33.23 and Zeta potential (mV) > -25.835                                                                                     | -0.2666 | 0.5893 | 0.1312 | 1  |
| BET surface area (m2/g) <= 107.75 and BET surface area (m2/g) > 45.705                                                                       | -0.2845 | 0.2798 | 0.1277 | 7  |
| BET surface area (m2/g) <= 15.31                                                                                                             | 0.3235  | 0.1905 | 0.1270 | 2  |
| Concentration (mg/L) <= 75.0 and TEM size (nm) >                                                                                             | 0.3308  | 0.1726 | 0.1250 | 1  |

|                                                                                                                                                                                     |         |        |        |    |
|-------------------------------------------------------------------------------------------------------------------------------------------------------------------------------------|---------|--------|--------|----|
| 16.785 and Hydrodynamic diameter (nm) > 363.47                                                                                                                                      |         |        |        |    |
| Concentration (mg/L) <= 75.0 and Concentration (mg/L) > 37.5 and TEM size (nm) <= 38.345 and Zeta potential (mV) > -25.835                                                          | 0.3310  | 0.1667 | 0.1234 | 1  |
| Concentration (mg/L) > 150.0 and Hydrodynamic diameter (nm) <= 415.67999 and Hydrodynamic diameter (nm) > 263.34999                                                                 | 0.4088  | 0.1012 | 0.1233 | 9  |
| Hydrodynamic diameter (nm) <= 900.76498 and BET surface area (m2/g) > 73.47                                                                                                         | 0.2546  | 0.3512 | 0.1215 | 1  |
| Concentration (mg/L) <= 150.0 and BET surface area (m2/g) <= 45.705 and BET surface area (m2/g) > 27.46                                                                             | 0.4117  | 0.0952 | 0.1208 | 6  |
| Concentration (mg/L) <= 150.0 and Concentration (mg/L) > 37.5 and Hydrodynamic diameter (nm) <= 415.67999 and BET surface area (m2/g) <= 149.7 and BET surface area (m2/g) > 45.705 | -0.4670 | 0.0714 | 0.1203 | 9  |
| Concentration (mg/L) <= 37.5 and TEM size (nm) <= 113.04 and TEM size (nm) > 38.345                                                                                                 | 0.5646  | 0.0476 | 0.1202 | 5  |
| Hydrodynamic diameter (nm) > 900.76498                                                                                                                                              | -0.4145 | 0.0833 | 0.1145 | 2  |
| Concentration (mg/L) <= 37.5 and TEM size (nm) > 13.07 and Hydrodynamic diameter (nm) > 263.34999                                                                                   | -0.2889 | 0.1905 | 0.1134 | 8  |
| Concentration (mg/L) <= 150.0 and Hydrodynamic diameter (nm) <= 363.47 and Hydrodynamic diameter (nm) > 263.34999                                                                   | -0.2699 | 0.2143 | 0.1108 | 5  |
| Concentration (mg/L) <= 37.5 and Hydrodynamic diameter (nm) <= 263.34999 and Zeta potential (mV) > -13.03                                                                           | 0.5537  | 0.0417 | 0.1106 | 10 |
| TEM size (nm) <= 24.155 and Zeta potential (mV) > -25.835                                                                                                                           | -0.2318 | 0.3333 | 0.1093 | 4  |
| Concentration (mg/L) <= 75.0 and Zeta potential (mV) > -11.6                                                                                                                        | -0.2279 | 0.3452 | 0.1083 | 7  |
| Concentration (mg/L) > 150.0 and BET surface area (m2/g) <= 127.18999 and BET surface area (m2/g) > 31.38                                                                           | -0.3304 | 0.1190 | 0.1070 | 10 |
| Concentration (mg/L) > 75.0 and Zeta potential (mV) > -9.325 and BET surface area (m2/g) > 107.75                                                                                   | 0.4275  | 0.0655 | 0.1057 | 4  |
| Concentration (mg/L) <= 150.0 and TEM size (nm) <= 28.685 and Zeta potential (mV) > -9.325                                                                                          | 0.2544  | 0.2202 | 0.1054 | 3  |
| Concentration (mg/L) > 150.0 and Zeta potential (mV) <= -25.835                                                                                                                     | 0.6811  | 0.0238 | 0.1038 | 7  |
| Concentration (mg/L) <= 150.0 and Concentration (mg/L) > 75.0 and Hydrodynamic diameter (nm) <= 331.87 and BET surface area (m2/g) <= 27.46                                         | -0.6080 | 0.0298 | 0.1033 | 10 |
| Concentration (mg/L) <= 37.5 and Hydrodynamic diameter (nm) <= 263.34999 and BET surface area                                                                                       | 0.5059  | 0.0417 | 0.1011 | 10 |

|                                                                                           |         |        |        |   |
|-------------------------------------------------------------------------------------------|---------|--------|--------|---|
| (m <sup>2</sup> /g) <= 149.7                                                              |         |        |        |   |
| Concentration (mg/L) > 75.0 and TEM size (nm) <= 16.785 and Zeta potential (mV) > -25.835 | -0.3170 | 0.1131 | 0.1004 | 1 |
| Hydrodynamic diameter (nm) <= 312.84999 and Hydrodynamic diameter (nm) > 276.06999        | 0.3514  | 0.0893 | 0.1002 | 2 |

**Table S5.** The rules generated by ten RuleFit models for RMC predictions (importance >0.1).

| Rule                                                                                                                       | Coefficient | Support | Importance | Model |
|----------------------------------------------------------------------------------------------------------------------------|-------------|---------|------------|-------|
| Concentration (mg/L) > 150.0 and TEM size (nm) > 14.68 and Zeta potential (mV) > -25.835                                   | 10.3069     | 0.1858  | 4.0091     | 5     |
| Concentration (mg/L) <= 75.0 and BET surface area (m <sup>2</sup> /g) > 45.705                                             | 7.7363      | 0.2920  | 3.5177     | 5     |
| Concentration (mg/L) > 75.0 and TEM size (nm) > 14.68 and BET surface area (m <sup>2</sup> /g) <= 45.705                   | 8.2850      | 0.2124  | 3.3886     | 5     |
| Concentration (mg/L) <= 150.0 and TEM size (nm) > 14.68 and Zeta potential (mV) > -25.835                                  | -6.4794     | 0.6018  | 3.1719     | 5     |
| Concentration (mg/L) > 37.5 and Hydrodynamic diameter (nm) > 840.285                                                       | -8.0683     | 0.1239  | 2.6582     | 5     |
| Concentration (mg/L) <= 150.0 and TEM size (nm) > 21.72                                                                    | 5.2965      | 0.4956  | 2.6481     | 5     |
| Concentration (mg/L) <= 150.0 and TEM size (nm) > 28.685 and BET surface area (m <sup>2</sup> /g) <= 27.46                 | -6.1359     | 0.1947  | 2.4296     | 5     |
| Concentration (mg/L) > 75.0 and BET surface area (m <sup>2</sup> /g) <= 45.705                                             | 4.7506      | 0.2301  | 1.9995     | 8     |
| Concentration (mg/L) > 150.0 and BET surface area (m <sup>2</sup> /g) <= 92.805                                            | -5.1862     | 0.1593  | 1.8979     | 5     |
| Hydrodynamic diameter (nm) > 363.47 and Zeta potential (mV) <= 1.595                                                       | -3.9821     | 0.2832  | 1.7941     | 5     |
| Concentration (mg/L) <= 37.5 and Hydrodynamic diameter (nm) <= 840.285                                                     | -3.9836     | 0.2035  | 1.6039     | 5     |
| Concentration (mg/L) <= 37.5 and Zeta potential (mV) > 1.595                                                               | 4.8770      | 0.1150  | 1.5561     | 5     |
| Concentration (mg/L) > 75.0 and TEM size (nm) > 31.95 and Hydrodynamic diameter (nm) > 253.07999                           | 3.9876      | 0.1770  | 1.5219     | 5     |
| Concentration (mg/L) <= 150.0 and BET surface area (m <sup>2</sup> /g) <= 45.705                                           | -3.2607     | 0.3097  | 1.5077     | 9     |
| Concentration (mg/L) > 150.0 and TEM size (nm) > 21.72                                                                     | -4.0208     | 0.1593  | 1.4714     | 5     |
| Concentration (mg/L) > 75.0 and BET surface area (m <sup>2</sup> /g) > 45.705                                              | -2.9750     | 0.2832  | 1.3404     | 8     |
| Concentration (mg/L) <= 75.0 and BET surface area (m <sup>2</sup> /g) <= 45.705                                            | -2.9596     | 0.2124  | 1.2105     | 9     |
| Concentration (mg/L) <= 150.0 and TEM size (nm) > 14.68 and BET surface area (m <sup>2</sup> /g) <= 45.705                 | -2.4872     | 0.3186  | 1.1589     | 5     |
| Concentration (mg/L) <= 75.0 and Hydrodynamic diameter (nm) <= 900.76498 and BET surface area (m <sup>2</sup> /g) > 45.705 | 2.4756      | 0.2478  | 1.0688     | 1     |
| Concentration (mg/L) > 75.0 and TEM size (nm) >                                                                            | 2.4103      | 0.2301  | 1.0144     | 9     |

|                                                                                                              |         |        |        |   |
|--------------------------------------------------------------------------------------------------------------|---------|--------|--------|---|
| 28.685 and Hydrodynamic diameter (nm) > 253.07999                                                            |         |        |        |   |
| Hydrodynamic diameter (nm) > 900.76498                                                                       | -3.8744 | 0.0708 | 0.9937 | 9 |
| TEM size (nm) <= 47.235 and Hydrodynamic diameter (nm) <= 763.89999 and BET surface area (m2/g) > 5.01       | 2.0663  | 0.6549 | 0.9824 | 8 |
| Concentration (mg/L) > 62.5 and BET surface area (m2/g) <= 5.01                                              | 3.6064  | 0.0796 | 0.9764 | 5 |
| Concentration (mg/L) <= 75.0 and TEM size (nm) > 18.56 and Zeta potential (mV) <= -13.03                     | -3.6387 | 0.0708 | 0.9333 | 9 |
| Concentration (mg/L) <= 75.0 and TEM size (nm) > 28.685 and BET surface area (m2/g) > 44.675                 | 4.0941  | 0.0531 | 0.9180 | 9 |
| Concentration (mg/L) > 75.0 and TEM size (nm) <= 28.685                                                      | -2.0351 | 0.2478 | 0.8786 | 9 |
| Concentration (mg/L) <= 75.0 and Hydrodynamic diameter (nm) > 253.07999 and BET surface area (m2/g) > 56.85  | -2.2046 | 0.1858 | 0.8575 | 8 |
| Concentration (mg/L) > 75.0 and Zeta potential (mV) <= -13.03                                                | 2.9025  | 0.0885 | 0.8243 | 9 |
| Concentration (mg/L) > 150.0 and TEM size (nm) <= 27.04                                                      | -2.5799 | 0.1150 | 0.8232 | 5 |
| Concentration (mg/L) <= 75.0 and Hydrodynamic diameter (nm) <= 253.07999                                     | 3.1716  | 0.0708 | 0.8135 | 5 |
| Concentration (mg/L) > 75.0 and BET surface area (m2/g) <= 127.18999                                         | -1.6454 | 0.3982 | 0.8055 | 5 |
| Concentration (mg/L) <= 75.0 and TEM size (nm) > 28.685 and BET surface area (m2/g) > 44.675                 | 3.1335  | 0.0708 | 0.8037 | 5 |
| Concentration (mg/L) > 75.0 and BET surface area (m2/g) <= 56.85                                             | 1.7828  | 0.2566 | 0.7787 | 9 |
| Concentration (mg/L) > 75.0 and TEM size (nm) > 113.04                                                       | 3.7236  | 0.0442 | 0.7657 | 9 |
| Concentration (mg/L) <= 75.0 and TEM size (nm) > 16.785 and BET surface area (m2/g) <= 45.705                | -1.9001 | 0.2035 | 0.7650 | 7 |
| Concentration (mg/L) <= 37.5 and Hydrodynamic diameter (nm) > 840.285                                        | 7.7317  | 0.0088 | 0.7241 | 5 |
| Concentration (mg/L) <= 150.0 and Zeta potential (mV) <= -9.325 and BET surface area (m2/g) <= 41.785        | -2.1684 | 0.1239 | 0.7144 | 8 |
| Zeta potential (mV) <= 1.595 and Zeta potential (mV) > -13.03                                                | -1.5367 | 0.2920 | 0.6987 | 1 |
| Concentration (mg/L) > 150.0 and TEM size (nm) > 24.155                                                      | -1.9778 | 0.1416 | 0.6895 | 9 |
| Concentration (mg/L) > 150.0 and TEM size (nm) <= 31.95 and TEM size (nm) > 21.72                            | -2.8090 | 0.0619 | 0.6771 | 8 |
| Concentration (mg/L) <= 75.0 and Hydrodynamic diameter (nm) <= 840.285 and BET surface area (m2/g) <= 45.705 | -1.5091 | 0.2124 | 0.6172 | 6 |



|                                                                                                                                                   |         |        |        |    |
|---------------------------------------------------------------------------------------------------------------------------------------------------|---------|--------|--------|----|
| Hydrodynamic diameter (nm) <= 900.76498 and BET surface area (m2/g) > 45.705                                                                      | 1.2226  | 0.5044 | 0.6113 | 8  |
| Concentration (mg/L) > 150.0 and TEM size (nm) <= 28.685                                                                                          | -1.8578 | 0.1150 | 0.5928 | 5  |
| Hydrodynamic diameter (nm) <= 276.06999                                                                                                           | -1.2858 | 0.2832 | 0.5793 | 8  |
| Concentration (mg/L) > 75.0 and Hydrodynamic diameter (nm) <= 253.07999                                                                           | -2.3650 | 0.0619 | 0.5701 | 5  |
| Hydrodynamic diameter (nm) <= 900.76498 and BET surface area (m2/g) <= 45.705                                                                     | -1.1484 | 0.4248 | 0.5677 | 8  |
| Concentration (mg/L) > 37.5 and Hydrodynamic diameter (nm) > 415.67999                                                                            | -1.2594 | 0.2743 | 0.5619 | 9  |
| Concentration (mg/L) <= 75.0 and Hydrodynamic diameter (nm) <= 840.285 and BET surface area (m2/g) > 45.705                                       | 1.3170  | 0.2301 | 0.5543 | 6  |
| Concentration (mg/L) <= 150.0 and TEM size (nm) > 14.68 and BET surface area (m2/g) > 45.705                                                      | 1.1579  | 0.3451 | 0.5505 | 5  |
| Concentration (mg/L) > 37.5 and BET surface area (m2/g) > 73.47                                                                                   | -1.1784 | 0.3097 | 0.5449 | 6  |
| Concentration (mg/L) > 75.0 and Zeta potential (mV) <= -16.015                                                                                    | 2.1975  | 0.0619 | 0.5297 | 5  |
| Concentration (mg/L) > 150.0 and BET surface area (m2/g) <= 45.705                                                                                | 1.6598  | 0.1150 | 0.5296 | 9  |
| Concentration (mg/L) > 37.5 and TEM size (nm) > 19.155 and Zeta potential (mV) <= 26.17                                                           | 1.0645  | 0.4425 | 0.5287 | 8  |
| Concentration (mg/L) > 37.5 and TEM size (nm) <= 16.785                                                                                           | -1.4074 | 0.1593 | 0.5150 | 1  |
| Concentration (mg/L) <= 75.0 and Hydrodynamic diameter (nm) > 220.665 and BET surface area (m2/g) <= 45.705                                       | -1.2431 | 0.2124 | 0.5084 | 1  |
| Concentration (mg/L) <= 75.0 and BET surface area (m2/g) <= 45.705                                                                                | -1.2417 | 0.2124 | 0.5078 | 6  |
| Concentration (mg/L) > 37.5 and Zeta potential (mV) <= 1.595 and Zeta potential (mV) > -13.03                                                     | -1.1867 | 0.2389 | 0.5061 | 10 |
| Hydrodynamic diameter (nm) > 344.45 and Zeta potential (mV) <= 1.595                                                                              | -1.0137 | 0.3628 | 0.4874 | 9  |
| TEM size (nm) > 28.685 and BET surface area (m2/g) > 27.46                                                                                        | 1.1160  | 0.2478 | 0.4818 | 8  |
| Concentration (mg/L) <= 75.0 and Hydrodynamic diameter (nm) <= 840.285 and BET surface area (m2/g) <= 45.705                                      | -1.1039 | 0.2301 | 0.4646 | 2  |
| BET surface area (m2/g) <= 45.705                                                                                                                 | -0.9374 | 0.4248 | 0.4634 | 8  |
| Concentration (mg/L) <= 75.0 and Hydrodynamic diameter (nm) <= 900.76498 and BET surface area (m2/g) <= 149.7 and BET surface area (m2/g) > 56.85 | 1.3903  | 0.1239 | 0.4581 | 2  |

|                                                                                                                             |         |        |        |    |
|-----------------------------------------------------------------------------------------------------------------------------|---------|--------|--------|----|
| Concentration (mg/L) > 37.5 and TEM size (nm) <= 28.685 and Zeta potential (mV) > -25.835                                   | -0.9840 | 0.3097 | 0.4550 | 3  |
| Concentration (mg/L) > 75.0 and Hydrodynamic diameter (nm) > 220.665 and BET surface area (m <sup>2</sup> /g) <= 45.705     | 1.0955  | 0.2124 | 0.4481 | 3  |
| Concentration (mg/L) > 75.0 and Hydrodynamic diameter (nm) <= 253.07999                                                     | -1.9464 | 0.0531 | 0.4364 | 9  |
| Concentration (mg/L) <= 37.5 and Hydrodynamic diameter (nm) > 415.67999                                                     | 1.4639  | 0.0973 | 0.4339 | 9  |
| Concentration (mg/L) <= 150.0                                                                                               | -0.9533 | 0.7257 | 0.4253 | 8  |
| Concentration (mg/L) <= 37.5 and TEM size (nm) <= 13.07                                                                     | 4.4642  | 0.0088 | 0.4181 | 8  |
| Concentration (mg/L) <= 75.0 and Zeta potential (mV) <= -11.7                                                               | -1.1638 | 0.1504 | 0.4161 | 1  |
| Concentration (mg/L) <= 37.5 and TEM size (nm) > 13.07 and Hydrodynamic diameter (nm) > 253.07999                           | -1.0646 | 0.1858 | 0.4141 | 10 |
| Concentration (mg/L) > 75.0 and BET surface area (m <sup>2</sup> /g) <= 45.705                                              | 1.0003  | 0.2124 | 0.4091 | 6  |
| Concentration (mg/L) <= 75.0 and BET surface area (m <sup>2</sup> /g) <= 56.85                                              | -0.9542 | 0.2389 | 0.4069 | 3  |
| Concentration (mg/L) > 62.5 and BET surface area (m <sup>2</sup> /g) <= 5.01                                                | 1.6772  | 0.0619 | 0.4043 | 1  |
| Concentration (mg/L) > 75.0 and Zeta potential (mV) <= 26.17 and Zeta potential (mV) > 23.25                                | -1.9482 | 0.0442 | 0.4006 | 9  |
| Concentration (mg/L) <= 75.0 and BET surface area (m <sup>2</sup> /g) <= 45.705                                             | -0.9788 | 0.2124 | 0.4003 | 3  |
| Concentration (mg/L) <= 150.0 and TEM size (nm) > 21.72 and Hydrodynamic diameter (nm) <= 401.64999                         | -0.7930 | 0.3805 | 0.3850 | 8  |
| Concentration (mg/L) > 37.5 and TEM size (nm) <= 24.475 and Hydrodynamic diameter (nm) > 415.67999                          | -1.0024 | 0.1593 | 0.3668 | 2  |
| Concentration (mg/L) > 75.0 and TEM size (nm) > 24.155 and BET surface area (m <sup>2</sup> /g) <= 127.18999                | 0.8495  | 0.2478 | 0.3668 | 10 |
| Concentration (mg/L) > 150.0 and BET surface area (m <sup>2</sup> /g) > 45.705                                              | -1.0688 | 0.1327 | 0.3626 | 9  |
| Concentration (mg/L) <= 75.0 and Hydrodynamic diameter (nm) <= 900.76498 and BET surface area (m <sup>2</sup> /g) <= 45.705 | -0.8777 | 0.2124 | 0.3590 | 10 |
| Concentration (mg/L) <= 150.0 and Zeta potential (mV) > 26.17                                                               | 1.0792  | 0.1062 | 0.3325 | 9  |
| Concentration (mg/L) > 150.0 and TEM size (nm) > 37.02                                                                      | 1.1289  | 0.0885 | 0.3206 | 6  |
| Zeta potential (mV) <= 1.595 and Zeta potential (mV) > -13.03 and BET surface area (m <sup>2</sup> /g) > 4.39               | -0.7037 | 0.2920 | 0.3200 | 7  |
| Zeta potential (mV) <= 1.595 and Zeta potential (mV) >                                                                      | -0.6944 | 0.3009 | 0.3185 | 6  |

|                                                                                                                                                               |         |        |        |    |
|---------------------------------------------------------------------------------------------------------------------------------------------------------------|---------|--------|--------|----|
| -13.03                                                                                                                                                        |         |        |        |    |
| Concentration (mg/L) <= 75.0 and Hydrodynamic diameter (nm) > 253.07999 and BET surface area (m <sup>2</sup> /g) <= 45.705                                    | -0.7593 | 0.2124 | 0.3105 | 6  |
| Concentration (mg/L) > 150.0 and TEM size (nm) <= 37.02                                                                                                       | -0.7918 | 0.1858 | 0.3080 | 6  |
| Concentration (mg/L) > 37.5 and TEM size (nm) <= 113.04 and Hydrodynamic diameter (nm) > 543.41499                                                            | -0.7852 | 0.1858 | 0.3054 | 4  |
| Concentration (mg/L) <= 150.0 and Zeta potential (mV) <= 26.17                                                                                                | 0.6365  | 0.6549 | 0.3026 | 5  |
| Concentration (mg/L) <= 75.0 and Hydrodynamic diameter (nm) <= 900.76498 and BET surface area (m <sup>2</sup> /g) > 45.705                                    | 0.6722  | 0.2566 | 0.2936 | 10 |
| Concentration (mg/L) <= 37.5 and TEM size (nm) <= 16.785                                                                                                      | 1.1231  | 0.0708 | 0.2881 | 1  |
| Concentration (mg/L) > 75.0 and Hydrodynamic diameter (nm) <= 900.76498 and BET surface area (m <sup>2</sup> /g) <= 45.705                                    | 0.6833  | 0.2124 | 0.2795 | 1  |
| Concentration (mg/L) > 75.0 and BET surface area (m <sup>2</sup> /g) > 45.705                                                                                 | -0.6022 | 0.3097 | 0.2785 | 4  |
| Concentration (mg/L) <= 150.0 and TEM size (nm) <= 28.685                                                                                                     | -0.5484 | 0.4159 | 0.2703 | 1  |
| TEM size (nm) <= 73.455 and BET surface area (m <sup>2</sup> /g) <= 27.46                                                                                     | -0.7457 | 0.1504 | 0.2666 | 8  |
| Concentration (mg/L) > 150.0 and Hydrodynamic diameter (nm) <= 415.67999 and Zeta potential (mV) <= 35.27 and BET surface area (m <sup>2</sup> /g) <= 181.475 | 0.8257  | 0.1062 | 0.2544 | 1  |
| Concentration (mg/L) <= 150.0 and TEM size (nm) > 13.07                                                                                                       | -0.5571 | 0.7257 | 0.2486 | 1  |
| Concentration (mg/L) <= 150.0 and BET surface area (m <sup>2</sup> /g) <= 127.18999                                                                           | 0.5015  | 0.5929 | 0.2464 | 5  |
| Concentration (mg/L) <= 75.0 and BET surface area (m <sup>2</sup> /g) <= 45.705                                                                               | -0.6017 | 0.2124 | 0.2461 | 1  |
| Concentration (mg/L) <= 150.0 and BET surface area (m <sup>2</sup> /g) <= 15.31 and BET surface area (m <sup>2</sup> /g) > 5.01                               | -1.0179 | 0.0619 | 0.2454 | 6  |
| Concentration (mg/L) > 37.5 and Zeta potential (mV) > -13.03 and BET surface area (m <sup>2</sup> /g) > 5.01                                                  | -0.4906 | 0.4602 | 0.2445 | 3  |
| Concentration (mg/L) <= 75.0 and BET surface area (m <sup>2</sup> /g) <= 45.705                                                                               | -0.5898 | 0.2124 | 0.2412 | 10 |
| Concentration (mg/L) > 75.0 and Hydrodynamic diameter (nm) > 253.07999 and BET surface area (m <sup>2</sup> /g) <= 5.01                                       | 0.9162  | 0.0708 | 0.2350 | 8  |
| TEM size (nm) <= 28.685 and Zeta potential (mV) > -25.835                                                                                                     | -0.4794 | 0.3982 | 0.2347 | 2  |

|                                                                                                                                                               |         |        |        |    |
|---------------------------------------------------------------------------------------------------------------------------------------------------------------|---------|--------|--------|----|
| Concentration (mg/L) > 75.0 and Hydrodynamic diameter (nm) > 291.38 and Zeta potential (mV) <= -11.7                                                          | 0.7325  | 0.1150 | 0.2337 | 1  |
| Concentration (mg/L) > 150.0 and Zeta potential (mV) > 5.565                                                                                                  | 0.7043  | 0.1239 | 0.2320 | 8  |
| Concentration (mg/L) > 75.0 and TEM size (nm) <= 73.455 and Zeta potential (mV) > -25.835                                                                     | -0.4692 | 0.3717 | 0.2267 | 10 |
| Concentration (mg/L) > 75.0 and Hydrodynamic diameter (nm) > 220.665                                                                                          | 0.4545  | 0.4513 | 0.2262 | 1  |
| Concentration (mg/L) <= 75.0 and BET surface area (m <sup>2</sup> /g) <= 45.705                                                                               | -0.5331 | 0.2301 | 0.2244 | 2  |
| Concentration (mg/L) <= 37.5 and Hydrodynamic diameter (nm) <= 543.41499 and Zeta potential (mV) <= -16.015                                                   | -0.9633 | 0.0531 | 0.2160 | 1  |
| Concentration (mg/L) > 75.0 and TEM size (nm) > 24.155 and BET surface area (m <sup>2</sup> /g) <= 56.85                                                      | 0.5184  | 0.2124 | 0.2120 | 10 |
| Concentration (mg/L) <= 150.0 and TEM size (nm) > 21.72 and Hydrodynamic diameter (nm) > 401.64999                                                            | 0.7054  | 0.0973 | 0.2091 | 8  |
| Concentration (mg/L) <= 37.5 and TEM size (nm) <= 24.155 and BET surface area (m <sup>2</sup> /g) <= 107.75                                                   | 0.8489  | 0.0619 | 0.2046 | 3  |
| Hydrodynamic diameter (nm) <= 900.76498 and Zeta potential (mV) <= 26.17                                                                                      | 0.4851  | 0.7699 | 0.2042 | 3  |
| Concentration (mg/L) <= 75.0 and Hydrodynamic diameter (nm) <= 900.76498 and Zeta potential (mV) > -25.835 and BET surface area (m <sup>2</sup> /g) <= 45.705 | -0.4987 | 0.2124 | 0.2040 | 4  |
| Concentration (mg/L) <= 75.0 and Hydrodynamic diameter (nm) <= 900.76498 and BET surface area (m <sup>2</sup> /g) > 45.705                                    | 0.4770  | 0.2389 | 0.2034 | 7  |
| Concentration (mg/L) > 75.0 and TEM size (nm) <= 24.155 and Zeta potential (mV) > -25.835                                                                     | -0.5185 | 0.1858 | 0.2017 | 10 |
| Concentration (mg/L) <= 75.0 and TEM size (nm) > 24.155 and BET surface area (m <sup>2</sup> /g) <= 48.595                                                    | -0.4905 | 0.2124 | 0.2006 | 10 |
| Concentration (mg/L) > 75.0 and TEM size (nm) > 28.685 and Zeta potential (mV) <= 19.25                                                                       | 0.5912  | 0.1327 | 0.2006 | 2  |
| Concentration (mg/L) <= 37.5 and TEM size (nm) > 16.785                                                                                                       | -0.4937 | 0.2035 | 0.1988 | 1  |
| Concentration (mg/L) <= 75.0 and Hydrodynamic diameter (nm) <= 900.76498 and Zeta potential (mV) > -25.835 and BET surface area (m <sup>2</sup> /g) > 45.705  | 0.4553  | 0.2124 | 0.1862 | 4  |
| Concentration (mg/L) > 150.0 and TEM size (nm) <= 24.155                                                                                                      | 0.6026  | 0.1062 | 0.1857 | 9  |
| Concentration (mg/L) > 62.5 and TEM size (nm) > 73.455                                                                                                        | 0.7039  | 0.0708 | 0.1805 | 8  |
| Hydrodynamic diameter (nm) > 220.665 and Zeta                                                                                                                 | -0.3777 | 0.3451 | 0.1796 | 2  |

|                                                                                                                                                                                        |         |        |        |    |
|----------------------------------------------------------------------------------------------------------------------------------------------------------------------------------------|---------|--------|--------|----|
| potential (mV) <= 5.565 and Zeta potential (mV) > -13.03                                                                                                                               |         |        |        |    |
| TEM size (nm) <= 73.455 and TEM size (nm) > 28.685 and BET surface area (m <sup>2</sup> /g) > 27.46                                                                                    | 0.4606  | 0.1858 | 0.1792 | 10 |
| Zeta potential (mV) > -13.03                                                                                                                                                           | -0.4187 | 0.7699 | 0.1762 | 1  |
| Concentration (mg/L) <= 75.0 and Hydrodynamic diameter (nm) > 253.07999                                                                                                                | -0.3545 | 0.4336 | 0.1757 | 3  |
| Concentration (mg/L) <= 75.0 and TEM size (nm) > 73.455                                                                                                                                | -0.7480 | 0.0531 | 0.1677 | 8  |
| Concentration (mg/L) <= 75.0 and Hydrodynamic diameter (nm) <= 900.76498 and Hydrodynamic diameter (nm) > 220.665 and BET surface area (m <sup>2</sup> /g) <= 45.705                   | -0.4086 | 0.2124 | 0.1671 | 4  |
| Concentration (mg/L) > 75.0 and Hydrodynamic diameter (nm) > 253.07999 and BET surface area (m <sup>2</sup> /g) > 5.01                                                                 | -0.3439 | 0.3717 | 0.1662 | 8  |
| Concentration (mg/L) <= 75.0 and TEM size (nm) > 14.68 and Hydrodynamic diameter (nm) <= 543.41499 and Zeta potential (mV) > -25.835 and BET surface area (m <sup>2</sup> /g) > 45.705 | 0.5023  | 0.1239 | 0.1655 | 7  |
| BET surface area (m <sup>2</sup> /g) > 5.01                                                                                                                                            | -0.4336 | 0.8496 | 0.1550 | 5  |
| Zeta potential (mV) <= 26.17 and Zeta potential (mV) > 1.595                                                                                                                           | 0.3259  | 0.3451 | 0.1549 | 9  |
| Hydrodynamic diameter (nm) <= 900.76498 and Zeta potential (mV) <= 26.17                                                                                                               | 0.3734  | 0.7876 | 0.1527 | 9  |
| Concentration (mg/L) > 37.5 and TEM size (nm) <= 28.685 and Zeta potential (mV) > -14.585                                                                                              | -0.3405 | 0.2655 | 0.1504 | 10 |
| Concentration (mg/L) > 75.0 and Hydrodynamic diameter (nm) > 253.07999 and BET surface area (m <sup>2</sup> /g) <= 45.705                                                              | 0.3756  | 0.1947 | 0.1487 | 2  |
| Concentration (mg/L) > 75.0 and Zeta potential (mV) > -25.835 and BET surface area (m <sup>2</sup> /g) > 127.18999                                                                     | -0.5740 | 0.0708 | 0.1472 | 3  |
| Concentration (mg/L) > 150.0 and TEM size (nm) > 32.42                                                                                                                                 | 0.4746  | 0.1062 | 0.1462 | 10 |
| Hydrodynamic diameter (nm) <= 900.76498 and Zeta potential (mV) <= 26.17                                                                                                               | 0.3529  | 0.7876 | 0.1443 | 6  |
| Concentration (mg/L) <= 75.0 and Hydrodynamic diameter (nm) <= 736.38501 and Zeta potential (mV) > -25.835 and BET surface area (m <sup>2</sup> /g) > 45.705                           | 0.3915  | 0.1593 | 0.1433 | 2  |
| Concentration (mg/L) > 75.0 and TEM size (nm) > 28.685 and Hydrodynamic diameter (nm) > 242.13499                                                                                      | 0.3498  | 0.2124 | 0.1431 | 5  |
| Concentration (mg/L) > 150.0 and BET surface area (m <sup>2</sup> /g) > 92.805                                                                                                         | 0.5276  | 0.0796 | 0.1428 | 5  |
| Hydrodynamic diameter (nm) > 276.06999 and Zeta                                                                                                                                        | 0.4080  | 0.1416 | 0.1422 | 5  |

|                                                                                                                                           |         |        |        |    |
|-------------------------------------------------------------------------------------------------------------------------------------------|---------|--------|--------|----|
| potential (mV) > 12.15                                                                                                                    |         |        |        |    |
| Concentration (mg/L) <= 75.0 and Hydrodynamic diameter (nm) > 220.665                                                                     | -0.2834 | 0.4690 | 0.1414 | 10 |
| Concentration (mg/L) > 75.0 and BET surface area (m2/g) <= 48.595                                                                         | 0.3390  | 0.2124 | 0.1387 | 1  |
| Concentration (mg/L) <= 37.5 and TEM size (nm) > 13.07 and Hydrodynamic diameter (nm) <= 532.265 and Hydrodynamic diameter (nm) > 220.665 | -0.3727 | 0.1593 | 0.1364 | 2  |
| Concentration (mg/L) <= 75.0 and Hydrodynamic diameter (nm) > 220.665 and BET surface area (m2/g) <= 56.85                                | -0.3139 | 0.2389 | 0.1339 | 3  |
| Concentration (mg/L) <= 75.0 and TEM size (nm) > 14.68 and Zeta potential (mV) > -14.585 and BET surface area (m2/g) > 45.705             | 0.4037  | 0.1239 | 0.1330 | 7  |
| Concentration (mg/L) > 75.0 and TEM size (nm) > 28.685 and BET surface area (m2/g) <= 44.675                                              | 0.3353  | 0.1947 | 0.1328 | 7  |
| TEM size (nm) > 28.685 and BET surface area (m2/g) <= 27.46                                                                               | -0.2937 | 0.2743 | 0.1310 | 8  |
| Concentration (mg/L) > 75.0 and TEM size (nm) > 14.68                                                                                     | 0.2651  | 0.4159 | 0.1306 | 10 |
| Concentration (mg/L) > 75.0 and BET surface area (m2/g) <= 45.705                                                                         | 0.3255  | 0.1947 | 0.1289 | 2  |
| Concentration (mg/L) <= 75.0 and TEM size (nm) > 24.155 and BET surface area (m2/g) <= 48.595                                             | -0.3083 | 0.2124 | 0.1261 | 4  |
| Concentration (mg/L) <= 75.0 and BET surface area (m2/g) > 73.47                                                                          | 0.2963  | 0.2124 | 0.1212 | 6  |
| Zeta potential (mV) <= 5.565                                                                                                              | -0.2419 | 0.5752 | 0.1196 | 8  |
| Concentration (mg/L) <= 150.0 and TEM size (nm) <= 73.455 and BET surface area (m2/g) <= 27.46                                            | -0.3448 | 0.1239 | 0.1136 | 10 |
| Concentration (mg/L) > 37.5 and TEM size (nm) <= 16.785                                                                                   | -0.2923 | 0.1681 | 0.1093 | 7  |
| Concentration (mg/L) > 150.0 and TEM size (nm) > 31.95                                                                                    | 0.3497  | 0.1062 | 0.1077 | 7  |
| Concentration (mg/L) <= 75.0 and Hydrodynamic diameter (nm) > 253.07999 and BET surface area (m2/g) <= 48.595                             | -0.2511 | 0.2301 | 0.1057 | 2  |
| Concentration (mg/L) > 150.0 and Zeta potential (mV) <= 2.46 and BET surface area (m2/g) > 29.635                                         | -0.4368 | 0.0619 | 0.1053 | 1  |
| Concentration (mg/L) <= 75.0 and TEM size (nm) > 16.785 and BET surface area (m2/g) <= 45.705                                             | -0.2467 | 0.2301 | 0.1038 | 2  |
| Concentration (mg/L) > 75.0 and BET surface area (m2/g) > 45.705                                                                          | -0.2290 | 0.2743 | 0.1022 | 6  |
| Concentration (mg/L) > 75.0 and TEM size (nm) > 28.685 and Hydrodynamic diameter (nm) > 253.07999                                         | 0.2535  | 0.1947 | 0.1004 | 7  |

|                                                   |  |  |  |  |
|---------------------------------------------------|--|--|--|--|
| and BET surface area (m <sup>2</sup> /g) ≤ 44.675 |  |  |  |  |
|---------------------------------------------------|--|--|--|--|

**Table S6.** Simplified intervals in different RuleGrid plots for RDW prediction.

**Table S6.1.** Simplified intervals of the hydrodynamic diameter in the RuleGrid plot for interactions between concentration and hydrodynamic diameter.

| <b>Raw interval</b>    | <b>Simply interval</b> |
|------------------------|------------------------|
| [197, 220.665]         | [197.0,220.665]        |
| [197, 263.34999]       | [197.0,263.35]         |
| [197, 312.84999]       | [197.0,312.85]         |
| [197, 363.47]          | [197.0,363.47]         |
| [197, 543.41499]       | [197.0,543.415]        |
| [197, 736.38501]       | [197.0,736.385]        |
| (220.665, 933.73]      | (220.665,933.73]       |
| (263.34999, 363.47]    | (263.35,363.47]        |
| (263.34999, 415.67999] | (263.35,415.68]        |
| (263.34999, 933.73]    | (263.35,933.73]        |
| (344.45, 736.38501]    | (344.45,736.385]       |
| (344.45, 900.76498]    | (365.472,917.247]      |
| (363.47, 900.76498]    | (365.472,917.247]      |
| (363.47, 933.73]       | (365.472,917.247]      |
| (390.5, 933.73]        | (365.472,917.247]      |
| (415.67999, 933.73]    | (415.68,933.73]        |
| (736.38501, 933.73]    | (736.385,933.73]       |
| (840.285, 933.73]      | (840.285,933.73]       |
| (900.76498, 933.73]    | (900.765,933.73]       |

**Table S6.2.** Simplified intervals of the TEM size in the RuleGrid plot for interactions between concentration and TEM size.

| <b>Raw interval</b> | <b>Simply interval</b> |
|---------------------|------------------------|
| [12.97, 13.07]      | [12.97,13.07]          |
| [12.97, 29.155]     | [12.97,29.155]         |
| [12.97, 38.345]     | [13.02,38.345]         |
| (13.07, 38.345]     | (13.02,38.345]         |
| (13.07, 132.11]     | (13.07,132.11]         |
| (14.68, 21.72]      | (14.68,21.72]          |
| (19.155, 28.685]    | (19.155,28.685]        |
| (28.685, 38.345]    | (28.685,38.345]        |
| (32.04, 132.11]     | (32.04,132.11]         |
| (38.345, 73.455]    | (38.345,73.455]        |
| (38.345, 113.04]    | (38.345,113.04]        |



(38.345, 132.11]

(38.345,132.11]

**Table S6.3.** Simplified intervals of the zeta potential in the RuleGrid plot for interactions between concentration and zeta potential.

| <b>Raw interval</b> | <b>Simply interval</b> |
|---------------------|------------------------|
| [-32.77, -25.835]   | [-32.77,-25.835]       |
| [-32.77, -16.015]   | [-32.77,-13.548]       |
| [-32.77, -13.03]    | [-32.77,-13.548]       |
| [-32.77, -11.6]     | [-32.77,-13.548]       |
| [-32.77, -4.945]    | [-32.77,-4.945]        |
| (-13.03, -9.325]    | (-13.03,-9.325]        |
| (-13.03, -4.945]    | (-13.03,-4.945]        |
| (-13.03, 26.17]     | (-13.03,26.17]         |
| (-13.03, 35.27]     | (-13.03,35.27]         |
| (-13.03, 44.07]     | (-12.315,44.07]        |
| (-11.6, 44.07]      | (-12.315,44.07]        |
| (-4.945, 44.07]     | (-4.945,44.07]         |
| (26.17, 35.27]      | (26.17,35.27]          |
| (26.17, 44.07]      | (26.17,44.07]          |
| (35.27, 44.07]      | (35.27,44.07]          |

**Table S6.4.** Simplified intervals of the zeta potential in the RuleGrid plot for interactions among concentration, hydrodynamic diameter, and zeta potential.

| <b>Raw interval</b> | <b>Simply interval</b> |
|---------------------|------------------------|
| [-32.77, -10.655]   | [-32.77,-10.655]       |
| [-32.77, 5.565]     | [-32.77,5.565]         |
| [-32.77, 21.87]     | [-32.77,23.863]        |
| [-32.77, 23.55]     | [-32.77,23.863]        |
| [-32.77, 26.17]     | [-32.77,23.863]        |
| (-25.835, 19.25]    | (-25.835,19.25]        |

**Table S7.** Simplified intervals in different RuleGrid plots for RMC prediction.

**Table S7.1.** Simplified intervals of the BET surface area in the RuleGrid plot for interactions between concentration and BET surface area.

| <b>Raw interval</b> | <b>Simply interval</b> |
|---------------------|------------------------|
| [4.07, 5.01]        | [4.07,5.01]            |
| [4.07, 45.705]      | [4.07,50.383]          |
| [4.07, 48.595]      | [4.07,50.383]          |
| [4.07, 56.85]       | [4.07,50.383]          |
| [4.07, 92.805]      | [4.07,92.805]          |
| [4.07, 127.18999]   | [4.07,127.19]          |
| (5.01, 15.31]       | (5.01,15.31]           |
| (45.705, 200.84]    | (45.705,200.84]        |
| (73.47, 200.84]     | (73.47,200.84]         |
| (92.805, 200.84]    | (92.805,200.84]        |

**Table S7.2.** Simplified intervals of the TEM size in the RuleGrid plot for interactions between concentration and TEM size.

| <b>Raw interval</b> | <b>Simply interval</b> |
|---------------------|------------------------|
| [12.97, 13.07]      | [12.97,14.928]         |
| [12.97, 16.785]     | [12.97,14.928]         |
| [12.97, 24.155]     | [12.97,26.627]         |
| [12.97, 27.04]      | [12.97,26.627]         |
| [12.97, 28.685]     | [12.97,26.627]         |
| [12.97, 37.02]      | [12.97,37.02]          |
| (13.07, 132.11]     | (14.845,132.11]        |
| (14.68, 132.11]     | (14.845,132.11]        |
| (16.785, 132.11]    | (14.845,132.11]        |
| (21.72, 132.11]     | (22.938,132.11]        |
| (21.72, 31.95]      | (21.72,31.95]          |
| (24.155, 132.11]    | (22.938,132.11]        |
| (31.95, 132.11]     | (33.797,132.11]        |
| (32.42, 132.11]     | (33.797,132.11]        |
| (37.02, 132.11]     | (33.797,132.11]        |
| (73.455, 132.11]    | (73.455,132.11]        |
| (113.04, 132.11]    | (113.04,132.11]        |

**Table S7.3.** Simplified intervals of the zeta potential in the RuleGrid plot for interactions between concentration and zeta potential.

| Raw interval      | Simply interval  |
|-------------------|------------------|
| [-32.77, -16.015] | [-32.77,-13.582] |
| [-32.77, -13.03]  | [-32.77,-13.582] |
| [-32.77, -11.7]   | [-32.77,-13.582] |
| [-32.77, 26.17]   | [-32.77,26.17]   |
| (-13.03, 1.595]   | (-13.03,1.595]   |
| (1.595, 44.07]    | (1.595,44.07]    |
| (5.565, 44.07]    | (5.565,44.07]    |
| (23.25, 26.17]    | (23.25,26.17]    |
| (26.17, 44.07]    | (26.17,44.07]    |

**Table S7.4.** Simplified intervals of the BET surface area in the RuleGrid plot for interactions among concentration, BET surface area, and TEM size.

| Raw interval     | Simply interval |
|------------------|-----------------|
| [4.07, 27.46]    | [4.07,27.46]    |
| [4.07, 45.705]   | [4.07,47.15]    |
| [4.07, 48.595]   | [4.07,47.15]    |
| (44.675, 200.84] | (45.19,200.84]  |
| (45.705, 200.84] | (45.19,200.84]  |

**Table S7.5.** Simplified intervals of the TEM size in the RuleGrid plot for interactions among concentration, BET surface area, and TEM size.

| Raw interval     | Simply interval |
|------------------|-----------------|
| [12.97, 73.455]  | [12.97,73.455]  |
| (14.68, 132.11]  | (15.732,132.11] |
| (16.785, 132.11] | (15.732,132.11] |
| (24.155, 132.11] | (26.42,132.11]  |
| (28.685, 132.11] | (26.42,132.11]  |

**Table S7.6.** Simplified intervals of the zeta potential in the RuleGrid plot for interactions among concentration, TEM size, and zeta potential.

| <b>Raw interval</b> | <b>Simply interval</b> |
|---------------------|------------------------|
| (14.68, 132.11]     | (17.465,132.11]        |
| (18.56, 132.11]     | (17.465,132.11]        |
| (19.155, 132.11]    | (17.465,132.11]        |
| [12.97, 28.685]     | [12.97,28.685]         |

**Table S8.** The top ten solutions obtained by three weighted sum methods.

**Table S8.1.** Equal-weighted solutions.

|                                           |        |        |        |        |        |        |                 |                 |        |        |
|-------------------------------------------|--------|--------|--------|--------|--------|--------|-----------------|-----------------|--------|--------|
| <b>Instance No.</b>                       | 1809   | 6095   | 2728   | 4934   | 7533   | 2727   | 786             | 5146            | 696    | 947    |
| <b>Composition</b>                        | CuO    | CuO    | CeO2   | CeO2   | CeO2   | CuO    | $\alpha$ -Fe2O3 | $\gamma$ -Fe2O3 | ZnO    | CeO2   |
| <b>Concentration (mg/L)</b>               | 50     | 50     | 50     | 50     | 50     | 50     | 50              | 50              | 50     | 50     |
| <b>TEM size (nm)</b>                      | 128.07 | 122.52 | 126.49 | 100.22 | 33.65  | 27.42  | 34.84           | 34.5            | 112.77 | 121.53 |
| <b>Hydrodynamic diameter (nm)</b>         | 723.62 | 377.07 | 380.08 | 364.51 | 672.52 | 777.1  | 448.64          | 389.66          | 545.25 | 679.01 |
| <b>Zeta potential (mV)</b>                | -17.78 | -22.88 | -18.01 | -21.79 | -21.46 | -25.28 | -18.71          | -15.07          | -14.39 | -14.54 |
| <b>BET surface area (m<sup>2</sup>/g)</b> | 9.21   | 32.24  | 9.85   | 10.8   | 25.11  | 39.32  | 23.35           | 34.32           | 15.68  | 23.81  |
| <b>RDW</b>                                | 0.9835 | 0.9815 | 0.9801 | 0.9796 | 0.9768 | 0.9752 | 0.9768          | 0.9758          | 0.9731 | 0.9737 |
| <b>RMC</b>                                | 0.0026 | 0.0033 | 0.0026 | 0.0026 | 0.0020 | 0.0010 | 0.0030          | 0.0035          | 0.0021 | 0.0032 |
| <b>Equal-weighted</b>                     | 0.9905 | 0.9891 | 0.9888 | 0.9885 | 0.9874 | 0.9871 | 0.9869          | 0.9862          | 0.9855 | 0.9852 |

**Table S8.2.** RDW-first solutions.

|                                           |        |        |        |        |        |                 |        |                 |        |                 |
|-------------------------------------------|--------|--------|--------|--------|--------|-----------------|--------|-----------------|--------|-----------------|
| <b>Instance No.</b>                       | 1809   | 6095   | 2728   | 4934   | 7533   | 786             | 2727   | 5146            | 947    | 7640            |
| <b>Composition</b>                        | CuO    | CuO    | CeO2   | CeO2   | CeO2   | $\alpha$ -Fe2O3 | CuO    | $\gamma$ -Fe2O3 | CeO2   | $\alpha$ -Fe2O3 |
| <b>Concentration (mg/L)</b>               | 50     | 50     | 50     | 50     | 50     | 50              | 50     | 50              | 50     | 50              |
| <b>TEM size (nm)</b>                      | 128.07 | 122.52 | 126.49 | 100.22 | 33.65  | 34.84           | 27.42  | 34.5            | 121.53 | 118.21          |
| <b>Hydrodynamic diameter (nm)</b>         | 723.62 | 377.07 | 380.08 | 364.51 | 672.52 | 448.64          | 777.1  | 389.66          | 679.01 | 487.81          |
| <b>Zeta potential (mV)</b>                | -17.78 | -22.88 | -18.01 | -21.79 | -21.46 | -18.71          | -25.28 | -15.07          | -14.54 | -14.42          |
| <b>BET surface area (m<sup>2</sup>/g)</b> | 9.21   | 32.24  | 9.85   | 10.8   | 25.11  | 23.35           | 39.32  | 34.32           | 23.81  | 20.91           |
| <b>RDW</b>                                | 0.9835 | 0.9815 | 0.9801 | 0.9796 | 0.9768 | 0.9768          | 0.9752 | 0.9758          | 0.9737 | 0.9737          |

|                  |        |        |        |        |        |        |        |        |        |        |
|------------------|--------|--------|--------|--------|--------|--------|--------|--------|--------|--------|
| <b>RMC</b>       | 0.0026 | 0.0033 | 0.0026 | 0.0026 | 0.0020 | 0.0030 | 0.0010 | 0.0035 | 0.0032 | 0.0032 |
| <b>RDW-first</b> | 0.9877 | 0.9861 | 0.9853 | 0.9849 | 0.9831 | 0.9828 | 0.9824 | 0.9820 | 0.9806 | 0.9806 |

**Table S8.3.** RMC-first solutions.

|                                   |        |        |        |        |        |        |                 |        |                 |        |
|-----------------------------------|--------|--------|--------|--------|--------|--------|-----------------|--------|-----------------|--------|
| <b>Instance No.</b>               | 1809   | 2728   | 6095   | 4934   | 2727   | 7533   | 786             | 696    | 5146            | 947    |
| <b>Composition</b>                | CuO    | CeO2   | CuO    | CeO2   | CuO    | CeO2   | $\alpha$ -Fe2O3 | ZnO    | $\gamma$ -Fe2O3 | CeO2   |
| <b>Concentration (mg/L)</b>       | 50     | 50     | 50     | 50     | 50     | 50     | 50              | 50     | 50              | 50     |
| <b>TEM size (nm)</b>              | 128.07 | 126.49 | 122.52 | 100.22 | 27.42  | 33.65  | 34.84           | 112.77 | 34.5            | 121.53 |
| <b>Hydrodynamic diameter (nm)</b> | 723.62 | 380.08 | 377.07 | 364.51 | 777.1  | 672.52 | 448.64          | 545.25 | 389.66          | 679.01 |
| <b>Zeta potential (mV)</b>        | -17.78 | -18.01 | -22.88 | -21.79 | -25.28 | -21.46 | -18.71          | -14.39 | -15.07          | -14.54 |
| <b>BET surface area (m2/g)</b>    | 9.21   | 9.85   | 32.24  | 10.8   | 39.32  | 25.11  | 23.35           | 15.68  | 34.32           | 23.81  |
| <b>RDW</b>                        | 0.9835 | 0.9801 | 0.9815 | 0.9796 | 0.9752 | 0.9768 | 0.9768          | 0.9731 | 0.9758          | 0.9737 |
| <b>RMC</b>                        | 0.0026 | 0.0026 | 0.0033 | 0.0026 | 0.0010 | 0.0020 | 0.0030          | 0.0021 | 0.0035          | 0.0032 |
| <b>RMC-first</b>                  | 0.9933 | 0.9922 | 0.9922 | 0.9921 | 0.9919 | 0.9916 | 0.9909          | 0.9904 | 0.9903          | 0.9898 |

**Table S9.** The 49 nanopriming candidates selected from RuleGrid plots.

| No.  | Composition                              | Concentration<br>(mg/L) | TEM size<br>(nm) | Hydrodynamic<br>diameter (nm) | Zeta potential<br>(mV) | BET surface<br>area (m <sup>2</sup> /g) |
|------|------------------------------------------|-------------------------|------------------|-------------------------------|------------------------|-----------------------------------------|
| 582  | $\alpha$ -Fe <sub>2</sub> O <sub>3</sub> | 50                      | 25.36            | 490.65                        | -17.08                 | 38.1                                    |
| 680  | Fe <sub>3</sub> O <sub>4</sub>           | 50                      | 28.78            | 852.38                        | -16.66                 | 30.52                                   |
| 696  | ZnO                                      | 50                      | 112.77           | 545.25                        | -14.39                 | 15.68                                   |
| 786  | $\alpha$ -Fe <sub>2</sub> O <sub>3</sub> | 50                      | 34.84            | 448.64                        | -18.71                 | 23.35                                   |
| 848  | ZnO                                      | 50                      | 132.11           | 823.24                        | -21.38                 | 37.91                                   |
| 919  | Fe <sub>3</sub> O <sub>4</sub>           | 50                      | 38.66            | 553.29                        | -17.31                 | 43.3                                    |
| 947  | CeO <sub>2</sub>                         | 50                      | 121.53           | 679.01                        | -14.54                 | 23.81                                   |
| 1209 | CeO <sub>2</sub>                         | 50                      | 94.51            | 361.4                         | -12.9                  | 18.09                                   |
| 1330 | TiO <sub>2</sub>                         | 50                      | 37.24            | 895.89                        | -15.38                 | 18.05                                   |
| 1506 | ZnO                                      | 50                      | 70.58            | 886.6                         | -32.77                 | 28.67                                   |
| 1526 | CeO <sub>2</sub>                         | 50                      | 26.18            | 444.64                        | -11.78                 | 38.17                                   |
| 1698 | SiO <sub>2</sub>                         | 50                      | 47.84            | 914.24                        | -22.55                 | 6.24                                    |
| 1799 | CuO                                      | 50                      | 121.62           | 739.5                         | -13.52                 | 22.35                                   |
| 1809 | CuO                                      | 50                      | 128.07           | 723.62                        | -17.78                 | 9.21                                    |
| 2075 | SiO <sub>2</sub>                         | 50                      | 50.9             | 672.81                        | -18.8                  | 27.82                                   |
| 2225 | Fe <sub>3</sub> O <sub>4</sub>           | 50                      | 26.55            | 888.02                        | -12.9                  | 24.22                                   |
| 2271 | Fe <sub>3</sub> O <sub>4</sub>           | 50                      | 91.34            | 923.17                        | -11.82                 | 16.59                                   |
| 2542 | $\alpha$ -Fe <sub>2</sub> O <sub>3</sub> | 50                      | 42.3             | 769.66                        | -26.02                 | 15.4                                    |
| 2727 | CuO                                      | 50                      | 27.42            | 777.1                         | -25.28                 | 39.32                                   |
| 2728 | CeO <sub>2</sub>                         | 50                      | 126.49           | 380.08                        | -18.01                 | 9.85                                    |
| 3103 | CeO <sub>2</sub>                         | 50                      | 66.11            | 485.08                        | -13.46                 | 29.89                                   |
| 3724 | SiO <sub>2</sub>                         | 50                      | 55.88            | 933.73                        | -12.39                 | 19.72                                   |
| 3763 | $\gamma$ -Fe <sub>2</sub> O <sub>3</sub> | 50                      | 54.25            | 801.01                        | -32.77                 | 21.5                                    |
| 4077 | $\gamma$ -Fe <sub>2</sub> O <sub>3</sub> | 50                      | 62.09            | 933.73                        | -21.64                 | 9.2                                     |
| 4141 | SiO <sub>2</sub>                         | 50                      | 24.18            | 906.82                        | -12.75                 | 12.26                                   |
| 4334 | Fe <sub>3</sub> O <sub>4</sub>           | 50                      | 45.05            | 844.64                        | -32.45                 | 43.73                                   |
| 4683 | Fe <sub>3</sub> O <sub>4</sub>           | 50                      | 39.15            | 933.73                        | -21.51                 | 32.93                                   |
| 4799 | CeO <sub>2</sub>                         | 50                      | 41.86            | 907.43                        | -18.45                 | 15.49                                   |
| 4934 | CeO <sub>2</sub>                         | 50                      | 100.22           | 364.51                        | -21.79                 | 10.8                                    |
| 5146 | $\gamma$ -Fe <sub>2</sub> O <sub>3</sub> | 50                      | 34.5             | 389.66                        | -15.07                 | 34.32                                   |
| 5356 | $\gamma$ -Fe <sub>2</sub> O <sub>3</sub> | 50                      | 26.3             | 933.73                        | -29.12                 | 23.79                                   |
| 5504 | Fe <sub>3</sub> O <sub>4</sub>           | 50                      | 42.01            | 895.99                        | -21.25                 | 12.68                                   |
| 5690 | Fe <sub>3</sub> O <sub>4</sub>           | 50                      | 104.48           | 488.46                        | -20.5                  | 33.2                                    |
| 5792 | CeO <sub>2</sub>                         | 50                      | 41.35            | 767.13                        | -12.76                 | 20.34                                   |
| 6008 | Fe <sub>3</sub> O <sub>4</sub>           | 50                      | 41.99            | 933.73                        | -20.16                 | 12.8                                    |
| 6095 | CuO                                      | 50                      | 122.52           | 377.07                        | -22.88                 | 32.24                                   |
| 6138 | $\gamma$ -Fe <sub>2</sub> O <sub>3</sub> | 50                      | 117.72           | 385.45                        | -19.49                 | 24.04                                   |
| 6626 | $\gamma$ -Fe <sub>2</sub> O <sub>3</sub> | 50                      | 37.98            | 381.28                        | -11.48                 | 26.98                                   |
| 6646 | Fe <sub>3</sub> O <sub>4</sub>           | 50                      | 26.09            | 933.73                        | -15.54                 | 4.82                                    |
| 6769 | $\alpha$ -Fe <sub>2</sub> O <sub>3</sub> | 50                      | 124.88           | 595.9                         | -13.93                 | 33.46                                   |

|             |                 |    |        |        |        |       |
|-------------|-----------------|----|--------|--------|--------|-------|
| <b>6777</b> | TiO2            | 50 | 24.99  | 495.65 | -12.49 | 19.16 |
| <b>7234</b> | $\alpha$ -Fe2O3 | 50 | 44.36  | 363.84 | -18.97 | 38.46 |
| <b>7335</b> | TiO2            | 50 | 40.74  | 412.54 | -11.35 | 25.01 |
| <b>7528</b> | ZnO             | 50 | 36.72  | 749.7  | -21.46 | 39.44 |
| <b>7533</b> | CeO2            | 50 | 33.65  | 672.52 | -21.46 | 25.11 |
| <b>7640</b> | $\alpha$ -Fe2O3 | 50 | 118.21 | 487.81 | -14.42 | 20.91 |
| <b>7641</b> | SiO2            | 50 | 87.45  | 790.79 | -32.77 | 8.53  |
| <b>7658</b> | Fe3O4           | 50 | 36.16  | 933.73 | -32.77 | 29.3  |
| <b>8063</b> | SiO2            | 50 | 43.94  | 447.35 | -15.38 | 24.05 |

---



**Table S10.** The top 49 nanopriming candidates ranked by their highest sum SHAP

values.

| No.  | Composition                              | Concentration<br>(mg/L) | TEM size<br>(nm) | Hydrodynamic<br>diameter (nm) | Zeta potential<br>(mV) | BET surface<br>area (m <sup>2</sup> /g) |
|------|------------------------------------------|-------------------------|------------------|-------------------------------|------------------------|-----------------------------------------|
| 267  | ZnO                                      | 50                      | 16.73            | 815.1                         | -15.45                 | 34.23                                   |
| 332  | ZnO                                      | 50                      | 36.89            | 894.75                        | -23.03                 | 45.65                                   |
| 582  | $\alpha$ -Fe <sub>2</sub> O <sub>3</sub> | 50                      | 25.36            | 490.65                        | -17.08                 | 38.1                                    |
| 696  | ZnO                                      | 50                      | 112.77           | 545.25                        | -14.39                 | 15.68                                   |
| 786  | $\alpha$ -Fe <sub>2</sub> O <sub>3</sub> | 50                      | 34.84            | 448.64                        | -18.71                 | 23.35                                   |
| 848  | ZnO                                      | 50                      | 132.11           | 823.24                        | -21.38                 | 37.91                                   |
| 947  | CeO <sub>2</sub>                         | 50                      | 121.53           | 679.01                        | -14.54                 | 23.81                                   |
| 1526 | CeO <sub>2</sub>                         | 50                      | 26.18            | 444.64                        | -11.78                 | 38.17                                   |
| 1698 | SiO <sub>2</sub>                         | 50                      | 47.84            | 914.24                        | -22.55                 | 6.24                                    |
| 1799 | CuO                                      | 50                      | 121.62           | 739.5                         | -13.52                 | 22.35                                   |
| 1809 | CuO                                      | 50                      | 128.07           | 723.62                        | -17.78                 | 9.21                                    |
| 2075 | SiO <sub>2</sub>                         | 50                      | 50.9             | 672.81                        | -18.8                  | 27.82                                   |
| 2260 | CuO                                      | 25                      | 72.19            | 257.99                        | 33.44                  | 13.49                                   |
| 2465 | CuO                                      | 25                      | 51.13            | 262.02                        | 31.65                  | 14.72                                   |
| 2542 | $\alpha$ -Fe <sub>2</sub> O <sub>3</sub> | 50                      | 42.3             | 769.66                        | -26.02                 | 15.4                                    |
| 2717 | TiO <sub>2</sub>                         | 25                      | 47.61            | 257.76                        | 31.53                  | 26.99                                   |
| 2727 | CuO                                      | 50                      | 27.42            | 777.1                         | -25.28                 | 39.32                                   |
| 2728 | CeO <sub>2</sub>                         | 50                      | 126.49           | 380.08                        | -18.01                 | 9.85                                    |
| 3103 | CeO <sub>2</sub>                         | 50                      | 66.11            | 485.08                        | -13.46                 | 29.89                                   |
| 3398 | CuO                                      | 25                      | 66.57            | 197                           | 29.97                  | 25.38                                   |
| 3763 | $\gamma$ -Fe <sub>2</sub> O <sub>3</sub> | 50                      | 54.25            | 801.01                        | -32.77                 | 21.5                                    |
| 3799 | CuO                                      | 25                      | 51.87            | 197                           | 28.57                  | 16.93                                   |
| 4077 | $\gamma$ -Fe <sub>2</sub> O <sub>3</sub> | 50                      | 62.09            | 933.73                        | -21.64                 | 9.2                                     |
| 4141 | SiO <sub>2</sub>                         | 50                      | 24.18            | 906.82                        | -12.75                 | 12.26                                   |
| 4636 | SiO <sub>2</sub>                         | 50                      | 21.82            | 730.53                        | -13.7                  | 37.17                                   |
| 4934 | CeO <sub>2</sub>                         | 50                      | 100.22           | 364.51                        | -21.79                 | 10.8                                    |
| 5146 | $\gamma$ -Fe <sub>2</sub> O <sub>3</sub> | 50                      | 34.5             | 389.66                        | -15.07                 | 34.32                                   |
| 5356 | $\gamma$ -Fe <sub>2</sub> O <sub>3</sub> | 50                      | 26.3             | 933.73                        | -29.12                 | 23.79                                   |
| 5504 | Fe <sub>3</sub> O <sub>4</sub>           | 50                      | 42.01            | 895.99                        | -21.25                 | 12.68                                   |
| 5690 | Fe <sub>3</sub> O <sub>4</sub>           | 50                      | 104.48           | 488.46                        | -20.5                  | 33.2                                    |
| 5836 | TiO <sub>2</sub>                         | 50                      | 57.89            | 752.1                         | -20.33                 | 44.58                                   |
| 6008 | Fe <sub>3</sub> O <sub>4</sub>           | 50                      | 41.99            | 933.73                        | -20.16                 | 12.8                                    |
| 6095 | CuO                                      | 50                      | 122.52           | 377.07                        | -22.88                 | 32.24                                   |
| 6134 | ZnO                                      | 50                      | 12.97            | 933.73                        | -32.77                 | 35.23                                   |
| 6138 | $\gamma$ -Fe <sub>2</sub> O <sub>3</sub> | 50                      | 117.72           | 385.45                        | -19.49                 | 24.04                                   |
| 6205 | CeO <sub>2</sub>                         | 50                      | 19.22            | 933.73                        | -25.96                 | 41.76                                   |
| 6446 | SiO <sub>2</sub>                         | 50                      | 21.44            | 456.86                        | -22.02                 | 37.62                                   |
| 6646 | Fe <sub>3</sub> O <sub>4</sub>           | 50                      | 26.09            | 933.73                        | -15.54                 | 4.82                                    |

|             |                                          |    |        |        |        |       |
|-------------|------------------------------------------|----|--------|--------|--------|-------|
| <b>6769</b> | $\alpha$ -Fe <sub>2</sub> O <sub>3</sub> | 50 | 124.88 | 595.9  | -13.93 | 33.46 |
| <b>6777</b> | TiO <sub>2</sub>                         | 50 | 24.99  | 495.65 | -12.49 | 19.16 |
| <b>7234</b> | $\alpha$ -Fe <sub>2</sub> O <sub>3</sub> | 50 | 44.36  | 363.84 | -18.97 | 38.46 |
| <b>7357</b> | CeO <sub>2</sub>                         | 50 | 21.96  | 933.73 | -29.4  | 30.1  |
| <b>7528</b> | ZnO                                      | 50 | 36.72  | 749.7  | -21.46 | 39.44 |
| <b>7533</b> | CeO <sub>2</sub>                         | 50 | 33.65  | 672.52 | -21.46 | 25.11 |
| <b>7640</b> | $\alpha$ -Fe <sub>2</sub> O <sub>3</sub> | 50 | 118.21 | 487.81 | -14.42 | 20.91 |
| <b>7641</b> | SiO <sub>2</sub>                         | 50 | 87.45  | 790.79 | -32.77 | 8.53  |
| <b>7968</b> | CuO                                      | 25 | 39.28  | 197    | 35.24  | 22.97 |
| <b>8063</b> | SiO <sub>2</sub>                         | 50 | 43.94  | 447.35 | -15.38 | 24.05 |
| <b>8130</b> | Fe <sub>3</sub> O <sub>4</sub>           | 50 | 14.41  | 783.91 | -14.06 | 36.79 |

---
